1  
2  
3  
4  
5  
6  
7  
8  
9  
10  
11  
12  
13  
14  
15  
16  
17

**Tuning site-specific dynamics to drive allosteric activation in a pneumococcal zinc uptake regulator**

Daiana A. Capdevila,<sup>†</sup> Fidel Huerta,<sup>†,‡</sup> Katherine A. Edmonds,<sup>†</sup> My T. Le,<sup>†</sup> Hongwei Wu,<sup>†</sup> and David P. Giedroc<sup>\*,†,§</sup>

<sup>†</sup>*Department of Chemistry, Indiana University, 800 E. Kirkwood Drive, Bloomington, IN 47405-7102, United States*

<sup>‡</sup>*Graduate Program in Biochemistry, Indiana University, 212 S. Hawthorne Drive, Bloomington, IN 47405, United States*

<sup>§</sup>*Department of Molecular and Cellular Biochemistry, Indiana University, 212 S. Hawthorne Drive, Bloomington, IN 47405 United States*

*Correspondence to David P. Giedroc: giedroc@indiana.edu*

## 18 **Abstract**

19 MarR (multiple antibiotic resistance repressor) family proteins are bacterial repressors that  
20 regulate transcription in response to a wide range of chemical signals.

21 Although specific features of MarR family function have been described, the role of atomic  
22 motions in MarRs remains unexplored thus limiting insights into the evolution of allostery in this  
23 ubiquitous family of repressors. Here, we provide the first experimental evidence that internal  
24 dynamics play a crucial functional role in MarR proteins. *Streptococcus pneumoniae* AdcR  
25 (adhesin-competence repressor) regulates Zn<sup>II</sup> homeostasis and Zn<sup>II</sup> functions as an allosteric  
26 activator of DNA binding. Zn<sup>II</sup> coordination triggers a transition from independent domains to a  
27 more compact structure. We identify residues that impact allosteric activation on the basis of  
28 Zn<sup>II</sup>-induced perturbations of atomic motions over a wide range of timescales. These findings  
29 reconcile the distinct allosteric mechanisms proposed for other MarRs and highlight the  
30 importance of conformational dynamics in biological regulation.

31

32

33

## 34 **Introduction**

35 Successful bacterial pathogens respond to diverse environmental insults or changes in  
36 intracellular metabolism by modulating gene expression (Alekshun & Levy, 2007). Such  
37 changes in gene expression are often mediated by “one-component” transcriptional regulators,  
38 which directly sense chemical signals and convert such signals into changes in transcription.  
39 Members of the multiple antibiotic resistance regulator (MarR) family are critical for the survival  
40 of pathogenic bacteria in hostile environments, particularly for highly antibiotic-resistant  
41 pathogens (Ellison & Miller, 2006, Yoon *et al.*, 2009, Weatherspoon-Griffin & Wing, 2016,  
42 Tamber & Cheung, 2009, Aranda *et al.*, 2009, Grove, 2017). Chemical signals sensed by MarRs  
43 include small molecule metabolites (Deochand & Grove, 2017), reactive oxygen species (ROS)  
44 (Liu *et al.*, 2017, Sun *et al.*, 2012) and possibly reactive sulfur species (RSS) (Peng *et al.*, 2017).  
45 It has been proposed that evolution of new MarR proteins enables micro-organisms to colonize  
46 new niches (Deochand & Grove, 2017), since species characterized by large genomes and a  
47 complex lifestyle encode many, and obligate parasitic species with reduced genome sizes encode  
48 few (Perez-Rueda *et al.*, 2004). Therefore, elucidating how new inducer specificities and  
49 responses have evolved in this ubiquitous family of proteins on what is essentially an unchanging  
50 molecule scaffold is of great interest, as is the molecular mechanism by which inducer binding or  
51 cysteine thiol modification allosterically regulates DNA operator binding in promoter regions of  
52 regulated genes.

53 Obtaining an understanding of how allostery has evolved in one-component regulatory  
54 systems (Ulrich *et al.*, 2005, Marijuan *et al.*, 2010), including MarR family repressors, requires a  
55 comprehensive analysis of the structural and dynamical changes that occur upon inducer and  
56 DNA binding (Capdevila *et al.*, 2017a, Tzeng & Kalodimos, 2013, West *et al.*, 2012, Tzeng &  
57 Kalodimos, 2009). For MarRs, several distinct allosteric mechanisms have been proposed, from

58 a “domino-like” response (Bordelon *et al.*, 2006, Gupta & Grove, 2014, Perera & Grove, 2010)  
59 to ligand binding-mediated effects on asymmetry within the dimer (Anandapadamanaban *et al.*,  
60 2016), to oxidative crosslinking of *E. coli* MarR dimers into DNA binding-incompetent tetramers  
61 (Hao *et al.*, 2014). While there are more than 130 crystal structures of MarR family repressors in  
62 different allosteric states (Fig. S1), an understanding of the role of atomic motions and the  
63 conformational ensemble in MarRs is nearly totally lacking and what is known is based  
64 exclusively on simulations (Anandapadamanaban *et al.*, 2016, Sun *et al.*, 2012). Here, we  
65 provide the first experimental evidence in solution that internal dynamics play a crucial  
66 functional role in a MarR protein, thus define characteristics that may have impacted the  
67 evolution of new biological outputs in this functionally diverse family of regulators.

68 In the conventional regulatory paradigm, the binding of a small molecule ligand, or the  
69 oxidation of conserved ROS-sensing cysteines induces a structural change in the homodimer that  
70 typically negatively impacts DNA binding affinity. This results in a weakening or dissociation  
71 of the protein-DNA complex and transcriptional derepression. Several reports provide evidence  
72 for a rigid body reorientation of the two  $\alpha 4$  (or  $\alpha R$ )-reading heads within the dimer (Fig. 1A-B,  
73 Fig. S1) (Alekshun *et al.*, 2001, Fuangthong & Helmann, 2002, Wilke *et al.*, 2008, Chang *et al.*,  
74 2010, Liu *et al.*, 2017, Deochand & Grove, 2017, Dolan *et al.*, 2011, Deochand *et al.*, 2016).  
75 The generality of this simple paradigm is inconsistent with the findings that some MarR proteins  
76 share very similar static structures in the active (DNA binding-competent) and inactive (DNA  
77 binding-incompetent) states (Anandapadamanaban *et al.*, 2016, Kim *et al.*, 2016, Liguori *et al.*,  
78 2016); furthermore, several active states have been shown to require a significant rearrangement  
79 to bind DNA (Alekshun *et al.*, 2001, Liu *et al.*, 2017, Zhu *et al.*, 2017b, Hao *et al.*, 2013, Gao *et*  
80 *al.*, 2017, Chin *et al.*, 2006, Saridakis *et al.*, 2008). In fact, a comprehensive analysis of all  
81 available MarR family structures strongly suggests that the degree of structural reorganization

82 required to bind DNA, characterized by a narrow distribution of  $\alpha 4$ - $\alpha 4'$  orientations, is  
83 comparable whether transitioning from the inactive *or* active states of the repressor (Fig. 1C,  
84 Table S1). These observations strongly implicate a conformational ensemble model of allostery  
85 (Motlagh *et al.*, 2014) (Fig. 1B-D), where inducer sensing impacts DNA binding by restricting  
86 the conformational spread of the active repressor, as was proposed in a recent molecular  
87 dynamics study (Anandapadamanaban *et al.*, 2016).

88 MarR proteins are obligate homodimers that share a winged-helical DNA-binding  
89 domain connected to a DNA-distal all-helical dimerization domain where organic molecules  
90 bind in a cleft between the two domains (Fig. S1B). Individual MarR members have been shown  
91 to bind a diverse range of ligands at different sites on the dimer (Otani *et al.*, 2016, Takano *et al.*,  
92 2016); likewise, oxidation-sensing cysteine residues are also widely distributed in the dimer  
93 (Fuangthong & Helmann, 2002, Liu *et al.*, 2017, Hao *et al.*, 2014, Dolan *et al.*, 2011, Chen *et al.*,  
94 2006). This functional diversity is accompanied by relatively low overall sequence similarity,  
95 which suggests that a conserved molecular pathway that connects sensing sites and the DNA  
96 binding heads is highly improbable. Complicating our current mechanistic understanding of this  
97 family is that for many members, including *E. coli* MarR, the physiological inducer (if any) is  
98 unknown, rendering functional conclusions on allostery from crystallographic experiments alone  
99 less certain (Hao *et al.*, 2014, Zhu *et al.*, 2017b).

100 In contrast to the extraordinary diversity of thiol-based switching MarRs, MarR family  
101 metallosensors are confined to a single known regulator of Zn<sup>II</sup> uptake, exemplified by AdcR  
102 (adhesin competence regulator) from *S. pneumoniae* and closely related *Streptococcus ssp.* (Loo  
103 *et al.*, 2003, Reyes-Caballero *et al.*, 2010) and ZitR from *Lactococcus spp.* (Llull *et al.*, 2011,  
104 Zhu *et al.*, 2017c). AdcR and ZitR both possess two closely spaced pseudotetrahedral Zn<sup>II</sup>  
105 binding sites termed site 1 and site 2 (Fig. 1A) that bind Zn<sup>II</sup> with different affinities (Reyes-

106 Caballero *et al.*, 2010, Guerra *et al.*, 2011, Sanson *et al.*, 2015, Zhu *et al.*, 2017c).  $Zn^{II}$  is an  
107 allosteric *activator* of DNA operator binding which is primarily dependent on the structural  
108 integrity of site 1 (Reyes-Caballero *et al.*, 2010, Zhu *et al.*, 2017c). ZitR has been recently  
109 extensively structurally characterized, with crystallographic models now available for the apo-  
110 and  $Zn^{II}_1$ - (bound to site 1) and  $Zn^{II}_2$ - and  $Zn^{II}_2$ -DNA operator complexes, thus providing  
111 significant new insights into ZitR and AdcR function (Zhu *et al.*, 2017c). These structures reveal  
112 that  $Zn^{II}_2$ -ZitR and  $Zn^{II}_2$ -AdcR form triangularly-shaped homodimers and are essentially  
113 identical, as anticipated from their high sequence identity (49%). Apo-ZitR adopts a  
114 conformation that is incompatible with DNA binding, and filling of both  $Zn^{II}$  sites is required to  
115 adopt a conformation that is similar to that of the DNA-complex. Thermodynamically, filling of  
116 the low affinity site 2 enhances allosteric activation of DNA-binding by  $\approx 10$ -fold, and this occurs  
117 concomitant with a change in the H42 donor atom to the site 1  $Zn^{II}$  ion from N $\epsilon$ 2 in the apo- and  
118  $Zn^{II}_1$ -states to N $\delta$ 1 in the  $Zn^{II}_2$ -ZitR (as in  $Zn^{II}_2$  AdcR; (Guerra *et al.*, 2011)) and  $Zn^{II}_2$  ZitR-DNA  
119 operator complexes (Zhu *et al.*, 2017c). Allosteric *activation* by  $Zn^{II}$  is in strong contrast to all  
120 other members of the MarR superfamily, consistent with its biological function as uptake  
121 repressor at high intracellular  $Zn^{II}$ .

122 Here we employ a combination of NMR-based techniques and small angle x-ray  
123 scattering (SAXS) to show that apo- (metal-free) AdcR in solution is characterized by multiple  
124 independent domains connected by flexible linkers, resulting in a distinct quaternary structure  
125 from the Zn-bound state previously structurally characterized (Guerra *et al.*, 2011). Our  
126 backbone relaxation dispersion-based NMR experiments show that apo-AdcR samples distinct  
127 conformational states in the  $\mu$ s-ms timescale, while  $Zn^{II}$  narrows this distribution by  
128 conformational selection, increasing the population of a state that has higher affinity for DNA.  
129 This finding is fully consistent with the crystallographic structures of  $Zn^{II}_2$  ZitR and the  $Zn^{II}_2$

130 ZitR:DNA complex (Zhu *et al.*, 2017c). The site-specific backbone and methyl sidechain  
131 dynamics in the ps-ns timescale show that Zn<sup>II</sup> not only induces a general restriction of these  
132 protein dynamics, but also enhances fast timescale, low-amplitude motions in the DNA binding  
133 domains. Together, these data reveal that Zn<sup>II</sup> coordination promotes a conformational change  
134 that reduces the entropic cost of DNA binding and enhances internal dynamics uniquely within  
135 the DNA binding domain, thus poising the repressor to interact productively with various DNA  
136 operator target sequences (Reyes-Caballero *et al.*, 2010). We demonstrate the predictive value of  
137 this allosteric model by functionally characterizing “cavity” mutants of AdcR (Capdevila *et al.*,  
138 2017a). Overall, our findings suggest that protein dynamics on a wide range of timescales  
139 strongly impact AdcR function. This ensemble model of allostery successfully reconciles the  
140 distinct mechanisms proposed for other MarR family repressors and suggests a mechanism of  
141 how evolution tunes dynamics to render distinct biological outputs (allosteric activation vs.  
142 allosteric inhibition) on a rigorously conserved molecular scaffold.

143

## 144 **Results and Discussion**

### 145 **Solution structural differences between apo and Zn<sup>II</sup> bound forms of AdcR**

146 Our crystal structure suggests that once AdcR is bound to both Zn<sup>II</sup>, the  $\alpha$ R- ( $\alpha$ 4) reading  
147 heads adopt a favorable orientation for DNA binding (Guerra *et al.*, 2011), a finding fully  
148 compatible with structural studies of *L. lactis* ZitR (Zhu *et al.*, 2017c) (Fig. 1A). These  
149 structural studies suggest a “pre-locked” model, where Zn<sup>II</sup> binding to both sites 1 and 2,  
150 concomitant with a H42 ligand atom switch, locks the AdcR homodimer into a DNA binding-  
151 competent conformation. This model makes the prediction that the unligated AdcR can explore  
152 conformations structurally incompatible with DNA binding, as shown previously for Zn<sup>II</sup><sub>1</sub> ZitR  
153 (Zhu *et al.*, 2017c), thus requiring a significant degree of reorganization to bind with high

154 affinity to the DNA (Fig. 1B). Despite significant efforts, it has not yet been possible to obtain  
155 the crystal structure of apo-AdcR, suggesting that the apo-repressor may be highly flexible in  
156 solution (Guerra *et al.*, 2011, Sanson *et al.*, 2015). Thus, we employed SAXS as a means to  
157 explore the apo-AdcR structure and elucidate the structural changes induced by Zn<sup>II</sup> binding and  
158 conformational switching within the AdcR homodimer.

159 We first examined the behavior of apo- and Zn<sup>II</sup>-bound states. Both states show Guinier  
160 plots indicative of monodispersity and similar radii of gyration ( $R_g$ ). These data reveal that each  
161 state is readily distinguished from the other in the raw scattering profiles (to  $q=0.5 \text{ \AA}^{-1}$ ) as well as  
162 in the PDDF plots ( $p(r)$  versus  $r$ ), with the experimental scattering curve of the Zn<sup>II</sup> bound state  
163 being consistent with one calculated from the Zn<sup>II</sup><sub>2</sub> AdcR crystal structure (Fig. 2A). Moreover,  
164 a qualitative analysis of the PDDF plots suggests that apo-AdcR is less compact than the Zn<sup>II</sup>-  
165 bound state (Fig. S2). The molecular scattering envelopes calculated as bead models with the *ab*  
166 *initio* program DAMMIF for apo-AdcR suggest that the differences between the apo and Zn<sup>II</sup>  
167 AdcR SAXS profiles can be explained on the basis of a reorientation of the winged helix-turn-  
168 helix motif with respect to the dimerization domain, particularly in a distortion in the  $\alpha 5$  helix  
169 (Fig. 2B). In an effort to obtain higher resolution models, we reconstructed atomic models from  
170 perturbations in the Zn-bound crystal structure that better fit the complete SAXS profiles  
171 ( $q < 1.0$ ). The models obtained confirm that the Zn-bound structure in solution resembles the  
172 crystallographic models of apo-ZitR and Zn<sup>II</sup> AdcR (Guerra *et al.*, 2011, Zhu *et al.*, 2017c);  
173 however, we note that the SAXS profile of the apo-AdcR differs significantly from the ZitR  
174 crystal structure (Fig. S2E) which is likely related to the high flexibility of this state in solution.  
175 Moreover, the resolution of SAXS based models cannot be used to obtain residue-specific  
176 information about structural perturbations introduced by Zn<sup>II</sup> binding (Fig. S2). Thus, we turned



177 to NMR-based techniques to provide both high resolution and site-specific information on this  
178 highly dynamic system.

179 TROSY NMR on 100% deuterated AdcR and optimized buffer conditions for both states  
180 (pH 5.5, 50 mM NaCl, 35 °C) enabled us to obtain complete backbone assignments for Zn<sup>II</sup>-  
181 AdcR and nearly complete for apo-AdcR (missing residues 21, 38-40 due to exchange  
182 broadening, Fig. 3). The chemical shift perturbation maps (Fig. 3A-B) reveal that the largest  
183 perturbations are found in the structural vicinity of the metal site region, *i.e.*, the  $\alpha$ 1- $\alpha$ 2 loop  
184 (residues 21-35), the remainder of the  $\alpha$ 2 helix (residues 41-47), and the central region of the  $\alpha$ 5  
185 helix, which provides donor groups to both site 1 (H108, H112) and site 2 (E107) Zn<sup>II</sup>. These  
186 changes derive from changes in secondary structure, such as the extension of the  $\alpha$ 1 helix and  
187 partial unfolding of the  $\alpha$ 2 helix (Fig. S3), as well as from proximity to the Zn<sup>II</sup>.

188 The changes in carbon chemical shifts in the central region of the  $\alpha$ 5 helix and the  
189 presence of strong NOEs to water for these residues are consistent with a kink in this helix in the  
190 apo-state (Fig. S3A-B), as is commonly found in other structurally characterized MarR  
191 repressors in DNA-binding inactive conformations (Zhu *et al.*, 2017b, Duval *et al.*, 2013).  
192 However, the kink is expected to be local and transient, since a TALOS+ analysis of chemical  
193 shifts predicts that the  $\alpha$ 5 helix remains the most probable secondary structure for all tripeptides  
194 containing these residues in the apo-state (Shen *et al.*, 2009) (Fig. S3C). The backbone changes  
195 in chemical shifts are accompanied by changes in the hydrophobic cores in the proximity of Zn<sup>II</sup>  
196 binding as reported by the stereospecific sidechain methyl group chemical shift perturbation  
197 maps (Fig. 3B). Comparatively smaller perturbations extend to the  $\alpha$ 1 helix and the C-terminal  
198 region of the  $\alpha$ 6 helix, DNA-binding  $\alpha$ 4 helix (S74) and into the  $\beta$ -wing itself, consistent with a

199 significant change in quaternary within the AdcR homodimer upon binding of both allosteric  
200 metal ions (Fig. 3A-B).

201 Overall, our NMR and SAXS data show that the main structural differences are localized  
202 in the region immediately surrounding the  $Zn^{II}$  coordination sites, giving rise to a change in the  
203 quaternary structure, while conserving the size and the overall secondary structure of the  
204 molecule. In particular, our data point to a kink in the  $\alpha 5$  helix and a structural perturbation in  
205 the  $\alpha 1$ - $\alpha 2$  loop, which could be inducing a reorientation of the winged helix-turn-helix motifs  
206 relative to the dimerization domain.

207 In an effort to understand the functional consequences of the structural perturbations in  
208 the  $\alpha 1$ - $\alpha 2$  loop, we compared the length of the loop that connects the dimerization domain with  
209 the winged helical motif among AdcR and other members of the MarR family of known  
210 structure. This structural comparison and an extensive multiple sequence alignment reveals that  
211 only AdcR-like repressors harbor an  $\alpha 1$ - $\alpha 2$  loop larger than 10 residues (Fig. 3C). This loop  
212 extension does not seem to originate from an insertion, but from a change in secondary structure  
213 of the C-terminal region of the  $\alpha 1$  helix (Fig. 3C). Moreover, in the  $Zn^{II}$  state that loop appears  
214 restricted by a hydrogen-bond network between the  $Zn^{II}$  binding site and the DNA binding  
215 domain (Chakravorty *et al.*, 2013). The  $Zn^{II}$ -ZitR crystal structure similarly has an  $\alpha 1$ - $\alpha 2$  loop  
216 that is restricted by metal coordination chemistry and other intermolecular contacts with the  
217 dimerization and DNA binding domains, despite lacking an identifiable hydrogen-bond network  
218 (Zhu *et al.*, 2017c). Overall, our analysis suggests that the flexibility of this loop prevents DNA-  
219 binding, while the interactions formed in response to  $Zn^{II}$  coordination may be important in  
220 allosteric activation of DNA binding. Such a dynamical model contrasts sharply with a rigid  
221 body motion mechanism as previously suggested for other MarRs (Alekhshun *et al.*, 2001, Chang

222 *et al.*, 2010, Dolan *et al.*, 2011, Saridakis *et al.*, 2008, Birukou *et al.*, 2014, Radhakrishnan *et al.*,  
223 2014), thus motivating efforts to understand how conformational dynamics impacts biological  
224 regulation by Zn<sup>II</sup> in AdcR.

225

## 226 **Zn<sup>II</sup>-induced changes in AdcR conformational plasticity along the backbone**

227 We therefore turned to an investigation of protein dynamics in AdcR. <sup>15</sup>N  $R_1$ ,  $R_2$ , and  
228 steady-state heteronuclear <sup>15</sup>N{<sup>1</sup>H} NOEs provide information on internal mobility along the  
229 backbone, as well as on the overall protein tumbling rate (Fig. 4A-D; Fig. S4). The  $R_1$  and  $R_2$   
230 data reveal that Zn<sup>II</sup><sub>2</sub> AdcR tumbles predominantly as a single globular unit in solution (Fig. 4B;  
231 Fig. S4) with a molecular correlation time ( $\tau_c$ ) of  $18.7 \pm 0.1$  ns, very similar to the  $\tau_c$  value  
232 predicted for the dimer at 35 °C (18.9 ns in D<sub>2</sub>O). The  $\beta$ -wing region tumbles independently  
233 from the rest of the molecule (Fig. 4B). These data also reveal that the  $\alpha 1$ - $\alpha 2$  linker region that  
234 donates the E24 ligand to Zn<sup>II</sup> binding site 1 is ordered to an extent similar to the rest of the  
235 molecule. In striking contrast, in apo-AdcR, the dimerization and DNA-binding domains have  
236 significantly smaller  $\tau_c$  values ( $10.9 \pm 0.5$  ns, Fig. 4A), close to that expected if these domains  
237 tumble independently of one another in solution; in addition, the  $\alpha 1$ - $\alpha 2$  loop is highly dynamic  
238 in the apo-state (see also Fig. S4). These findings are consistent with the SAXS data, which  
239 show that apo-AdcR is less compact than the Zn<sup>II</sup><sub>2</sub> state. As in the Zn<sup>II</sup><sub>2</sub> state, the  $\beta$ -wing  
240 tumbles independently of the rest of the molecule, revealing that a change in the flexibility or  
241 orientation of the  $\beta$ -hairpin is likely not part of the allosteric mechanism, contrary to what has  
242 been proposed for other MarRs on the basis of crystal structures alone (Liu *et al.*, 2017,  
243 Deochand & Grove, 2017, Kim *et al.*, 2016). Overall, the <sup>15</sup>N relaxation data for backbone  
244 amides show that Zn<sup>II</sup> binding leads to a reduction of mobility of the  $\alpha 1$ - $\alpha 2$  loop, which in turn,

245 decreases the dynamical independence the DNA-binding and dimerization domains, thereby  
246 stabilizing a conformation that tumbles in solution as a single globular unit.

247 To further probe the reduction of flexibility upon  $Zn^{II}$  binding, we investigated sub-  
248 nanosecond backbone mobility as reported by the steady-state heteronuclear  $^{15}N\{^1H\}$  NOEs  
249 (Fig. 4C-D). These hNOE data confirm that the internal mobility of the apo-state on this  
250 timescale mainly localizes to the  $\alpha1$ - $\alpha2$  loop and the central region of the  $\alpha5$  helix, around E107  
251 ( $Zn^{II}$  site 2 ligand) and H108 and H112 ( $Zn^{II}$  site 1 ligands). The short-timescale flexibility in  
252 this region is significantly restricted upon  $Zn^{II}$  binding, but somewhat paradoxically leads to an  
253 *increase* in sub-nanosecond backbone motion in the DNA-binding domain, particularly in the  $\alpha3$   
254 helix and the N-terminal region of the  $\alpha4$  helix, which harbors the key DNA-binding  
255 determinants (Fig. S1A) (Zhu *et al.*, 2017c). The quenching of sub-nanosecond mobility in the  
256  $\alpha1$ - $\alpha2$  loop by  $Zn^{II}$  is accompanied by a corresponding increase in mobility on the  $\mu$ s-ms (slow)  
257 timescale in this region (Fig. 4F). In addition, the slow timescale backbone dynamics show a  
258 restriction of a conformational sampling in a band across the middle of the dimerization domain,  
259 including the upper region of the  $\alpha5$  helix, the N-terminus of  $\alpha1$ , and the C-terminus of  $\alpha6$  (Fig.  
260 4E-F). These slow motions in the apo-state likely report on a global breathing mode of the  
261 homodimer reflective of the conformational ensemble, which is substantially restricted upon  $Zn^{II}$   
262 binding.

263 These large differences in structure and dynamics between the apo and  $Zn^{II}_2$  AdcRs  
264 suggest an allosteric mechanism that relies on a redistribution of internal mobility in both fast-  
265 and slow timescale regimes, rather than one described by a rigid body motion. This mobility  
266 redistribution restricts the flexibility of the ligand binding site from the sub-nanosecond  
267 timescale in the apo-form to the millisecond timescale in the  $Zn^{II}_2$  state (Fig. 4C,F). This

268 restriction links the motion of the two functional domains (Fig. 4A-B) and locks AdcR in a  
269 triangular shape compatible with DNA binding. On the other hand, Zn<sup>II</sup> enhances the internal  
270 flexibility in the DNA binding domain (Fig. 4C-D), which other studies show plays a role in  
271 sequence recognition and high affinity binding, particularly on the side chains (Capdevila *et al.*,  
272 2017a, Kalodimos *et al.*, 2004, Anderson *et al.*, 2013).

273

### 274 **Zn<sup>II</sup>-induced perturbations of side chain conformational disorder in AdcR**

275 Unlike the backbone, perturbations in side chain flexibility in the sub-nanosecond  
276 timescale are capable of reporting on the underlying thermodynamics of Zn<sup>II</sup> binding and the role  
277 of conformational entropy ( $\Delta S_{\text{conf}}$ ) in the allosteric mechanism. These perturbations potentially  
278 pinpoint residues with functional roles, *i.e.*, allosteric hotspots (Capdevila *et al.*, 2017a), with the  
279 change in the methyl group order parameter ( $\Delta S^2_{\text{axis}}$ ) upon ligand binding employed as a  
280 dynamical proxy (Capdevila *et al.*, 2017a, Caro *et al.*, 2017). Thus, if the motional redistribution  
281 observed in the backbone upon Zn<sup>II</sup> binding is accompanied by changes in the dynamics on the  
282 side chains, particularly those in the DNA binding regions, these fast internal dynamics could  
283 affect the entropy of the metal binding and play a major role in the allosteric mechanism. To test  
284 these ideas, we first measured the axial order parameter,  $S^2_{\text{axis}}$ , for all 82 methyl groups,  
285 comparing the apo- and Zn-bound states of AdcR (Fig. 5A, Fig. S5). These dynamics changes  
286 are overall consistent with the stiffening observed along protein backbone, *e.g.*, in the  $\alpha 1$ - $\alpha 2$   
287 loop; L26, in particular, is strongly impacted, changing motional regimes,  $|\Delta S^2_{\text{axis}}| > 0.2$ )  
288 (Frederick *et al.*, 2007). This stiffening prevails all over the molecule, leading to a small net  
289 decrease in conformational entropy upon Zn<sup>II</sup> coordination ( $-T\Delta S_{\text{conf}} = 3.4 \pm 0.4 \text{ kcal mol}^{-1}$ ) (Fig.  
290 5A). However, as has been previously shown for other transcriptional regulators (Capdevila *et*  
291 *al.*, 2017a, Tzeng & Kalodimos, 2012), the binding of the allosteric ligand Zn<sup>II</sup> actually leads to a

292 redistribution of sidechain mobility throughout the entire molecular scaffold. Interestingly, most  
293 of the methyl groups that change motional regimes are located in the DNA binding domain (Fig.  
294 S7). In particular, the side chain flexibility of many residues in the  $\alpha 3$  helix *increases*, including  
295 L47, L57, L61, while a small hydrophobic core in the C-terminus of the  $\alpha 4$  helix stiffens  
296 significantly, *e.g.*, L81, V34. These changes are accompanied by perturbations in the dynamics at  
297 the dimer interface, *i.e.*, L4, I16, V14, in both motional regimes as reported by  $\Delta S^2_{\text{axis}}$  and  $\Delta R_{\text{ex}}$   
298 (in the  $\mu\text{s}$ -ms timescale), the latter derived from relaxation dispersion experiments (Table S2;  
299 Fig. S5C).

300

### 301 **On-pathway and off-pathway allosterically impaired mutants of AdcR**

302 Our previous work (Capdevila *et al.*, 2017a) makes the prediction that “dynamically  
303 active” sidechains (methyl groups with  $|\Delta S^2_{\text{axis}}| \geq 0.2$  upon  $\text{Zn}^{\text{II}}$  binding) (see Fig. 5) are crucial for  
304 allosteric activation of DNA binding by  $\text{Zn}^{\text{II}}$ . To test this prediction, we prepared and  
305 characterized several mutant AdcRs in an effort to disrupt allosteric activation of DNA binding,  
306 while maintaining the structure of the dimer and high affinity  $\text{Zn}^{\text{II}}$  binding. Since it was not clear  
307 *a priori* how mutations that perturb mobility distributions in one timescale or the other (sub-ns or  
308  $\mu\text{s}$ -ms) would impact function, we focused on two kinds of substitution mutants: cavity mutants  
309 of dynamically “active” methyl-bearing side chains positioned in either the DNA binding or the  
310 dimerization subdomains (Fig. 6A, B) (Capdevila *et al.*, 2017a), and substitutions in the  
311 hydrogen-bonding pathway in the Zn-state that may contribute to the rigidity of the  $\alpha 1$ - $\alpha 2$  loop  
312 in  $\text{Zn}^{\text{II}}_2$ -AdcR (Fig. 6A) (Chakravorty *et al.*, 2013). We measured DNA binding affinities of the  
313 apo and zinc-saturated  $\text{Zn}^{\text{II}}_2$ -states, and calculated the allosteric coupling free energy,  $\Delta G_c$ , from  
314  $\Delta G_c = -RT \ln(K_{\text{Zn,DNA}}/K_{\text{apo,DNA}})$  (Giedroc & Arunkumar, 2007) (Fig. 6C and Table S2). All

315 mutants are homodimers by size-exclusion chromatography (Fig. S9) and all bind the first  
316 equivalent of  $Zn^{II}$  tightly as wild-type AdcR (Fig. S10, Table S3).

317 *DNA-binding domain mutants.* The redistribution fast time scale side-chain dynamics in  
318 the DNA binding domain is delocalized throughout the different secondary structure motifs.  
319 Thus, we prepared several cavity mutants of methyl-bearing residues in the  $\alpha 3$  (L57, L61),  $\alpha 4$   
320 (L81) and  $\alpha 5$  (I104) helices, as well as two residues in the  $\alpha 1$ - $\alpha 2$  loop in close proximity to the  
321 N-terminus of  $\alpha 2$ , V34 and L36. I104 is the most distal from the bound DNA in the  $Zn^{II}_2$  ZitR-  
322 DNA complex (Zhu *et al.*, 2017c), and is not dynamically active in AdcR ( $|\Delta S^2_{axis}| < 0.1$ ;  
323  $\Delta R_{ex} < 1.0$ ); thus, the I104A mutant is predicted to function as a control substitution. V34 and L36  
324 are dynamically active on both timescales, which is not surprising since the  $\alpha 1$ - $\alpha 2$  loop folds  
325 upon  $Zn^{II}$  binding to AdcR (*vide supra*) (Zhu *et al.*, 2017c). In contrast, L57, L61 and L81 are  
326 characterized by significant perturbations in  $\Delta S^2_{axis}$  only ( $|\Delta S^2_{axis}| \geq 0.2$ ), with L81 stiffening and  
327 L57 and L61 methyls in the  $\alpha 3$  helix becoming significantly more dynamic upon  $Zn^{II}$  binding  
328 (Fig. 5A, Table S2).

329 As expected, I104A AdcR is characterized by DNA binding affinities in the apo- and Zn-  
330 states just  $\approx 2$ -fold lower than wild-type AdcR, returning a  $\Delta G_c$  that is not statistically different  
331 from wild-type AdcR (Fig. 6C). Functional characterization of all other cavity mutants in the  
332 DNA binding domain results in a  $\approx 5$ -10-fold decrease or greater (L57V AdcR; Table S2) in the  
333 DNA binding affinity of the apo-state (Fig. 6C), with  $Zn^{II}$  binding inducing markedly variable  
334 degrees of allosteric activation (Fig. 6C). L36A, closest to the  $\alpha 2$  N-terminus, is most like wild-  
335 type AdcR, while V34A AdcR is severely crippled in allostery, with  $K_{Zn,DNA}$  some 200-fold  
336 lower than wild-type AdcR, and  $\Delta G_c \approx 2$ -fold lower, from  $-4.0$  to  $-2.2$  kcal mol $^{-1}$ . L81V and  
337 L61A AdcRs are comparably perturbed, and L57M AdcR even more so ( $\Delta G_c \approx -2.0$  kcal mol $^{-1}$ ).

338 We emphasize that these methyl-bearing side chains targeted for substitution are  $\geq 95\%$  buried  
339 and none are expected to be in direct contact with the DNA (Fig. 6B, Table SI). These data  
340 provide strong support for the idea that those methyl-bearing side chains in the DNA-binding  
341 domain that exhibit large changes in conformational entropy (as measured by  $\Delta S^2_{\text{axis}}$ ) make  
342 significant contributions to both DNA binding and allosteric activation by  $\text{Zn}^{\text{II}}$ . This result  
343 highlights the contribution that dynamical redistribution within the DNA-binding domain makes  
344 for AdcR function, as has been observed in other transcriptional regulators (Tzeng & Kalodimos,  
345 2012; Capdevila *et al.*, 2017a).

346 *Hydrogen-bonding mutants.* A hydrogen-bonding pathway in AdcR (Chakravorty *et al.*,  
347 2013) has previously been proposed to transmit the  $\text{Zn}^{\text{II}}_2$  binding signal to the DNA binding  
348 domain. In this pathway, the O $\epsilon$ 1 atom from the  $\text{Zn}^{\text{II}}$  ligand E24 accepts a hydrogen bond from  
349 the carboxamide side chain of N38. N38 is the +1 residue of the  $\alpha 2$  helix, which is then  
350 connected to the  $\alpha 4$  helix via a hydrogen bond between the Q40 and S74 side chains; further,  
351 Q40 accepts a hydrogen bond from the  $\gamma$ -OH of T37 as part of a non-canonical helix N-capping  
352 interaction (Guerra *et al.*, 2011) (Fig. 6A). We expect that regardless of the impact that these  
353 interactions have on the overall energetics of  $\text{Zn}^{\text{II}}$  binding, they are important in the restriction of  
354 fast-time scale dynamics in the  $\alpha 1$ - $\alpha 2$  loop. We therefore targeted residues E24 (Zn-ligand and  
355 H-bound acceptor), N38 and Q40, by characterizing two single mutants, E24D and N38A, and  
356 the double mutant, N38A/Q40A AdcR. Although all three mutants undergo allosteric switching  
357 as revealed by  $^1\text{H}$ - $^{15}\text{N}$  TROSY spectra (Fig. S11), as with all other DNA-binding domain  
358 mutants, all three exhibit  $\approx 5$ -10-fold decreases in apo-state DNA-binding affinity (Fig. 6C; Table  
359 S2). While the single mutant N38A binds  $\text{Zn}^{\text{II}}$  to give  $\Delta G_c$  of  $\approx -3.5$  kcal mol $^{-1}$ , quite similar to  
360 that of wild-type AdcR, in marked contrast, N38A/Q40A AdcR is functionally perturbed,  
361 characterized by a  $\Delta G_c$  of  $\approx -1.9$  kcal mol $^{-1}$  and is E24D AdcR that target a  $\text{Zn}^{\text{II}}$  binding residue



362 (Fig. 6C). These perturbations provide additional evidence that this hydrogen-bonding pathway  
363 may contribute to the motional restriction of the  $\alpha$ 1- $\alpha$ 2 loop, jointly with a redistribution of  
364 internal dynamics in the DNA binding domain. This effect can be perturbed directly by mutation  
365 of “dynamically active” sidechains (L81V, L61V, L57M) or by significantly impacting the  
366 interactions that restrict the loop (N38A/Q40A).

367 *Dimerization domain mutants.* To test the functional role of the dimerization domain in  
368 dynamical changes, we targeted three methyl-bearing residues in this domain, including L4 and  
369 I16 on opposite ends of the  $\alpha$ 1 helix and V142, near the C-terminus of the  $\alpha$ 6 helix (Fig. 6B).  
370 L16 is closest to the intervening minor groove of the DNA operator, while V142 and L4 are  
371 increasingly distant from the DNA. These residues are primarily active in slow timescale  
372 dynamics, with Zn<sup>II</sup>-binding quenching side chain mobility on the  $\mu$ s-ms timescale, *i.e.*, global  
373 motions, but relatively smaller changes in  $\Delta S^2_{\text{axis}}$  (Fig. 5B; Table S2). Cavity mutants of these  
374 residues (I16A, L4A and V142A) bind DNA in the apo-state with wild-type like affinities, but  
375 each is allosterically strongly perturbed, with only  $\approx$ 10-20-fold allosteric activation by Zn<sup>II</sup>,  
376 giving  $\Delta G_c$  values of  $-1.4$  to  $-1.8$  kcal mol<sup>-1</sup>.

377 These findings suggest that Zn<sup>II</sup>-dependent quenching of global motions far from the  
378 DNA binding domain play a significant role in allostery in this system. Our characterization of  
379 allosterically compromised mutants that affect site-specific conformational entropy (L81V,  
380 L61V, L57M) and conformational exchange (V34A, L4A, I16A) provides evidence for two  
381 classes of functional dynamics in AdcR that comprise different regions of the molecule,  
382 operating on different timescales (from sub-nanoseconds to milliseconds). Thus, we propose that  
383 a Zn<sup>II</sup>-dependent redistribution of internal dynamics quenches global, slow motions in the dimer,  
384 yet enhances local dynamical disorder in the DNA binding domain, which can ultimately be  
385 harnessed to maximize contacts at the protein-DNA interface.

## 386 **Conclusions**

387           Members of the multiple antibiotic resistance repressor (MarR) family of proteins  
388 comprise at least 12,000 members (Capdevila *et al.*, 2017b), and many have been subjected to  
389 significant structural inquiry since the original discovery of the *E. coli mar* operon and  
390 characterization of *E. coli* MarR some 25 years ago (Cohen *et al.*, 1993, Seoane & Levy, 1995).  
391 The crystallographic structure of this prototypical *E. coli* MarR appeared a number of years later  
392 (Alekshun *et al.*, 2001) and has inspired considerable efforts to understand the inducer specificity  
393 and mechanisms of transcriptional regulation in *E. coli* MarR (Hao *et al.*, 2014) and other MarR  
394 family repressors (Grove, 2013), which collectively respond to an wide range of stimuli,  
395 including small molecules, metal ions, antibiotic and oxidative stress (Deochand & Grove,  
396 2017). We have examined the wealth of the crystallographic data available from 137 MarR  
397 family repressor structures solved in a variety of functional states, including DNA-binding  
398 competent, DNA-binding incompetent and DNA-bound states (Fig. 1). This analysis of the  
399 crystal structures suggests that conformational selection induced by ligand binding or thiol  
400 oxidation must be operative in a significant number of these repressor systems. Here, we present  
401 the first site-specific dynamics analysis of any MarR family repressor in solution, and establish  
402 that conformational dynamics on a range of timescales is a central feature of Zn<sup>II</sup>-dependent  
403 allosteric activation of DNA operator binding by the zinc uptake regulator, *S. pneumoniae* AdcR  
404 (Reyes-Caballero *et al.*, 2010) and closely related repressors (Zhu *et al.*, 2017c).

405           We explored dynamics in the sub-nanosecond and  $\mu$ s-ms timescales with residue-specific  
406 resolution, both along the backbone, as measured by N-H bond vectors, and in the methyl groups  
407 of the methyl-bearing side chains of Ala, Met, Val, Leu and Ile. These measurements, coupled  
408 with small angle x-ray scattering measurements of both conformational states, lead to a  
409 consistent picture of allosteric activation by Zn<sup>II</sup> in AdcR. The apo-state conformational

410 ensemble is far broader than the  $Zn^{II}_2$  state, and features dynamical uncoupling of the core DNA-  
411 binding and dimerization domains, facilitated by rapid, low amplitude motions in the  $\alpha 1$ - $\alpha 2$  loop  
412 and the  $\alpha 5$  helix in the immediate vicinity of the  $Zn^{II}$  coordinating residues. This motion is  
413 superimposed on a much slower, larger amplitude mobility across the dimerization domain, far  
414 from the DNA interface, affecting both backbone amide and side chain methyl groups (Fig. 4-5).  
415  $Zn^{II}$  binding substantially quenches both the low amplitude internal motions and global, larger  
416 amplitude movements, while driving a striking redistribution of these dynamics into the DNA-  
417 binding domain.

418 As we observed previously for another  $Zn^{II}$  metalloregulatory protein,  $Zn^{II}$  binding  
419 induces a net global conformational stiffening, superimposed on pockets of increased dynamical  
420 disorder, particularly in the  $\alpha 3$ - $\alpha 4$  region of the DNA binding domain (Fig. 5A). It is interesting  
421 to note that the structures of  $Zn^{II}_2$ -bound AdcR and DNA-bound  $Zn^{II}_2$  ZitR differ most strongly  
422 in the  $\alpha 3$ - $\alpha 4$  region (Fig. 6B), suggesting that internal dynamics in this region may be  
423 functionally important in enhancing DNA binding affinity. To test the functional importance of  
424 fast-time scale motions in the DNA binding domain, we exploited the side chain dynamics  
425 results (Fig. 5) (Capdevila *et al.*, 2017a) to design cavity substitutions of dynamically active  
426 residues (Fig. 6). We generally find that cavity substitutions in the DNA binding domain are  
427 strongly deleterious for residues that are dynamically active in the fast timescale ( $|\Delta S^2_{axis}| > 0.2$ ),  
428 *i.e.* L81, L61, L57. These findings confirm a functional role of these changes in dynamics  
429 (Capdevila *et al.*, 2017a) and suggest that  $Zn^{II}_2$ -bound AdcR has an optimal distribution of  
430 internal dynamics that if perturbed, leads to weakened DNA binding.

431 Crystallographic studies suggest that DNA binding in MarR repressors is optimized by  
432 precisely tuning interactions with the DNA operator sequence, resulting in a favorable  $\Delta H$  of

433 binding (Hong *et al.*, 2005, Dolan *et al.*, 2011, Quade *et al.*, 2012, Birukou *et al.*, 2014, Zhu *et al.*, 2017a, Gao *et al.*, 2017, Otani *et al.*, 2016) with the functional consequences of ligand  
434 binding known to vary widely among individual MarRs (Deochand & Grove, 2017). We  
435 propose here, based on this and previous work, that tighter DNA binding can be achieved by  
436 optimization of side-chain dynamics that give rise to a more favorable conformational entropy  
437 term ( $\Delta S_{\text{conf}}$ ) and the functional consequences of ligand binding can be predicted based on the  
438 protein internal motions. We show here that single point mutations in AdcR, sufficient to impact  
439 internal motions, result in destabilization of the ternary complex. We showed previously that  
440 ligand binding can inhibit formation of the DNA complex by restricting the coupled fast motions  
441 and concerted slower motions that contribute to a favorable conformational entropy of DNA  
442 binding (Capdevila *et al.*, 2017a). This can potentially be the case also for introduction of  
443 dynamic elements, *i.e.*, loops or disordered regions (Pabis *et al.*, 2018, Campbell *et al.*, 2016).  
444 Thus, in the context of evolution of the MarR repressors, we propose that two allosteric modes,  
445 activation and inhibition, may have evolved by tuning the conformational entropy contribution to  
446 DNA binding (Fig. 7).

448       Allosteric inhibition could have arisen by evolution of a ligand binding pocket where  
449 inducer recognition disrupts internal dynamics and increases the conformational entropic cost of  
450 binding to DNA, as we have previously shown for an ArsR family protein (Capdevila *et al.*,  
451 2017a). Although this hypothesis has not been tested experimentally on any MarR, molecular  
452 dynamics simulations show that DNA binding-impaired mutants of MexR differ from the wild-  
453 type repressor in the nature of the dynamical connection between the dimerization and DNA  
454 binding domains (Anandapadamanaban *et al.*, 2016). This dynamical connectivity is in fact,  
455 exploited by the binding the ArmR peptide, leading to DNA dissociation (Anandapadamanaban  
456 *et al.*, 2016, Wilke *et al.*, 2008). We propose that conformational entropy can contribute to other

457 mechanisms of allosteric inhibition to yield a repressor that binds tightly to the operator sequence  
458 and yet has the ability to readily evolve new inducer specificities.

459         On the other hand, allosteric activation could have evolved by perturbing internal  
460 dynamics on the apo-protein and increasing the conformational entropic cost of DNA binding.  
461 This perturbation could arise by the introduction of loops or disordered regions in the apo-protein  
462 that could be compensated by a ligand binding event that restores the internal dynamics to yield a  
463 more favorable entropy contribution to DNA binding (Fig. 7). Similarly, it has been shown that  
464 another well-studied, allosterically activated, bacterial regulator, catabolite activator protein  
465 (CAP) (Tzeng & Kalodimos, 2013, Tzeng & Kalodimos, 2012) is able to harness conformational  
466 entropy to increase DNA binding affinity upon ligand binding. In the case of MarRs, the far  
467 longer  $\alpha 1$ - $\alpha 2$  linker in AdcRs (Fig. 3) may have been an important intermediate determinant in  
468 the evolution of allostery in AdcR, given the key role this loop plays in dynamical uncoupling of  
469 the dimerization and DNA-binding domains in the ligand-free state (Fig. 7).

470         This model makes the prediction that if conformational entropy can be harnessed to bind  
471 DNA with high affinity, perturbations introduced by ligand binding or subtle change in protein  
472 sequence that conserve the molecular scaffold can easily lead to inactivation of DNA binding  
473 (Fig. 7). It is interesting to note that mutations that lead to inactivation are not necessarily part of  
474 a physical pathway with the DNA binding site (Clarke *et al.*, 2016), since they only need to  
475 affect dynamical properties that are likely delocalized in an extended network. Notably, single  
476 point mutants in the dimerization domain of various MarR family repressors have been shown to  
477 modulate allostery and DNA binding (Anandapadamanaban *et al.*, 2016, Deochand *et al.*, 2016,  
478 Liguori *et al.*, 2016, Duval *et al.*, 2013, Alekshun & Levy, 1999, Andresen *et al.*, 2010). In the  
479 case of AdcR, structural perturbations induced by  $Zn^{II}$  binding are essentially confined to the  $Zn^{II}$   
480 binding pocket, *i.e.*, the  $\alpha 1$ - $\alpha 2$  loop and the  $\alpha 5$  helix proximal to the  $Zn^{II}$  donor ligands (Fig. 3).

481 In striking contrast, dynamical perturbations extend all over the molecule, and feature many  
482 residues that are far from either ligand binding site, and are dynamically active on the sub-  
483 nanosecond and/or  $\mu$ s-ms timescales (Figs. 4-5). Thus, the conformational entropy contribution  
484 being inherently delocalized and easily perturbed can enable rapid optimization of new  
485 inactivation mechanisms that would allow new biological functionalities to arise (Fig 7).  
486 Moreover, we suggest that changes in the site-specific dynamics, derived from differences in the  
487 amino acid sequence, could evolve allosteric activation from allosteric inhibition in the context  
488 of the same overall molecular scaffold. These findings inspire efforts to explore the evolution of  
489 allostery in this remarkable family of transcriptional repressors, by exploiting an allosterically  
490 crippled AdcR (see Fig. 6) to re-evolve functional allostery on this system.

491

## 492 **Materials and Methods**

### 493 **AdcR mutant plasmid production**

494 An overexpression plasmid for *S. pneumoniae* AdcR in a pET3a vector was obtained as  
495 previously described and was used as a template for the production of all mutant plasmids  
496 (Reyes-Caballero *et al.*, 2010). Mutant AdcR plasmids were constructed by PCR-based site-  
497 directed mutagenesis, and verified using DNA sequencing.

498

### 499 **Protein production and purification**

500 AdcR plasmids were transformed into either *E. coli* BL21(DE3) pLysS or Rosetta cells. *E. coli*  
501 cultures were either grown in LB media or M9 minimal media supplemented with  $^{15}\text{NH}_4\text{Cl}$  as the  
502 sole nitrogen source with simple  $^1\text{H}$ ,  $^{15}\text{N}$  HSQC spectroscopy to assess the structural integrity of  
503 selected mutant proteins. Protein samples for backbone and methyl group assignments of AdcR

504 were isotopically labeled using published procedures as described in our previous work  
505 (Capdevila *et al.*, 2017a, Arunkumar *et al.*, 2007), with all isotopes for NMR experiments  
506 purchased from Cambridge Isotope Laboratories. Protein expression and purification were  
507 carried out essentially as previously described (Reyes-Caballero *et al.*, 2010). All proteins were  
508 confirmed to have <0.05 molar equivalents of Zn(II) as measured by atomic absorption  
509 spectroscopy and were dimeric by gel filtration chromatography. The AdcR protein  
510 concentration was measured using the estimated molar extinction coefficient at 280 nm of 2980  
511  $M^{-1} \text{ cm}^{-1}$ .

512

### 513 **Small angle x-ray scattering experiments**

514 Small angle and wide angle x-ray scattering data of the apo and  $Zn^{II}_2$  states of AdcR was  
515 collected at three different protein concentrations (5 mg/mL, 2.5 mg/mL and 1.25 mg/mL) in  
516 buffer 25 mM MES pH 5.5, 400 mM NaCl, 2 mM EDTA/10  $\mu$ M  $ZnCl_2$ , 2 mM TCEP at sector  
517 12ID-B at the Advanced Photo Source (APS) at Argonne National Laboratory. For each protein  
518 concentration and matching background buffer, 30 images were collected and averaged using  
519 NCI-SAXS program package. The scattering profile at each concentration was manually  
520 adjusted with the scale factor to remove the effect of concentration prior to subtraction of the  
521 scattering profile of the buffer. Scattering profiles of each protein concentration were then  
522 merged for further analysis. The GUINIER region was plotted with  $\ln(I(q))$  vs  $q^2$  to check for  
523 monodispersity of the sample and to obtain  $I_0$  and the radius of gyration ( $R_g$ ) within the range of  
524  $q_{max} * R_g < 1.3$ . The  $R_g$  values obtained for apo-AdcR and  $Zn(II)$ -bound-AdcR are  $25.5 \pm 0.9 \text{ \AA}$  and  
525  $23.7 \pm 1.1 \text{ \AA}$ , respectively. The scattering profiles of each AdcR conformational state was then  
526 normalized with  $I_0$ . The compaction of each states of AdcR was examined using the Kratky plot  
527 for  $q < 0.3 \text{ \AA}^{-1}$ . Scattering profiles for apo and  $Zn^{II}_2$  states of AdcR were then Fourier-transformed

528 using GNOM of the ATSAS package to obtain the normalized pair-wise distance distribution  
529 graph (PDDF).  
530 *Ab initio* modeling was performed using the program DAMMIF in a slow mode (Franke  
531 & Svergun, 2009). For each conformational state of AdcR, 10 models were obtained. These  
532 models were compared, aligned and averaged using the DAMSEL, DAMSUP, DAMAVER,  
533 DAMFILT, respectively, as described in the ATSAS package ([http://www.embl-](http://www.embl-hamburg.de/bioSAXS)  
534 [hamburg.de/bioSAXS](http://www.embl-hamburg.de/bioSAXS)). Normalized spatial discrepancy (NSD) between each pair of the models  
535 was computed. The model with the lowest NSD value was selected as the reference against  
536 which the other models were superimposed. Outliner models (2 models) with an NSD above  
537 mean + 2\*standard deviation of NSD were removed before averaging. For refinement, the  
538 averaged envelope of the first run was used as search volume for the second round of modeling.  
539 Modeling of the envelope of apo-AdcR was restrained by enforcing  $P_2$  rotational symmetry  
540 while that Zn<sup>II</sup><sub>2</sub> AdcR was restrained using compact, hallow and no-penalty constraints.  
541 Scattering profiles of crystal structures were calculated using the fast x-ray scattering (FOXS)  
542 webserver (<https://modbase.compbio.ucsf.edu/foxs/>) (Schneidman-Duhovny *et al.*, 2010).

543

#### 544 **Mag-fura-2 competition assays**

545 All mag-fura-2 competition experiments were performed on an ISS PC1 spectrofluorometer in  
546 operating steady-state mode or a HP8453 UV-Vis spectrophotometer as described in our  
547 previous work (Capdevila *et al.*, 2017a, Campanello *et al.*, 2013) using the following solution  
548 conditions: 10 mM Hepes, pH 7.2, 400 mM NaCl that was chelex treated to remove  
549 contaminating metals. 10  $\mu$ M protein concentration was used for all and MF2 concentration  
550 ranged from 13-16  $\mu$ M. These data were fit using a competitive binding model with DynaFit  
551 (Kuzmic, 1996) to determine zinc binding affinities for wild-type and each mutant AdcR using a



552 four-site-nondissociable homodimer binding model, as previously described (Reyes-Caballero *et*  
553 *al.*, 2010) with  $K_{Zn} = 4.9 \times 10^6 \text{ M}^{-1}$  for mag-fura-2 fixed in these fits.  $K_1$  and  $K_2$  correspond to  
554 filling the two high affinity sites (site 1), and only a lower limits ( $\geq 10^9 \text{ M}^{-1}$ ) could be obtained for  
555 these sites;  $K_3$  and  $K_4$  were allowed to vary in the fit, and are reported in Table S3. Experiments  
556 were conducted 3 times for each AdcR variant. Errors of the binding constant parameters were  
557 estimated from global fits.

558

### 559 **NMR spectroscopy**

560 NMR spectra were acquired on a Varian VNMRs 600 or 800 MHz spectrometer, each equipped  
561 with a cryogenic probe, at the Indiana University METACyt Biomolecular NMR laboratory.  
562 The two-dimensional spectra were processed using NMRPipe (Delaglio *et al.*, 1995). The three-  
563 dimensional spectra were acquired using Poisson-gap non-uniform sampling and reconstructed  
564 using hmsIST (Hyberts *et al.*, 2012) and analyzed using SPARKY (Goddard & Kneller) or  
565 CARA (<http://cara.nmr.ch>). Typical solution conditions were  $\sim 500 \mu\text{M}$  protein (protomer), 25  
566 mM MES pH 5.5, 50 mM NaCl, 1 mM TCEP, 0.02% (w/v)  $\text{NaN}_3$ , and 10 %  $\text{D}_2\text{O}$ . Some spectra  
567 were recorded at pH 6.0 as indicated. Our previous NMR studies of AdcR (Guerra *et al.*, 2011,  
568 Guerra & Giedroc, 2014) were carried out with samples containing  $\approx 70\%$  random fractional  
569 deuteration, pH 6.0, 50 mM NaCl, 35 °C; under those conditions, the backbone amides of  
570 residues 21-26 in the  $\alpha 1$ - $\alpha 2$  loop and harboring zinc ligand E24 as well as the N-terminal region  
571 of the  $\alpha 2$  helix (residues 37-40) exhibited significant conformational exchange broadening in the  
572 apo-state and could not be assigned (Guerra *et al.*, 2011). In this work, we acquired  
573 comprehensive  $^1\text{H}$ - $^{15}\text{N}$  TROSY-edited NMR data sets at 600 and 800 MHz for a 100%  
574 deuterated AdcR sample in both apo- and  $\text{Zn}_2$ -bound states at pH 5.5, 50 mM NaCl, 35° C.  
575 Under these conditions, only four backbone amides residues in the apo-state were broadened

576 beyond detection (residues 21, 38-40); all were visible and therefore assignable in the  $Zn^{II}_2$  state.  
577 Thus, the N-terminus of the  $\alpha 2$  helix, including N38 and Q40 are clearly exchange broadened in  
578 the apo-state. Sidechains were assigned following published procedures as described in our  
579 previous work (Capdevila *et al.*, 2017a, Arunkumar *et al.*, 2007). The Leu and Val methyl  
580 resonances were distinguished using through-bond information such as HMCMBCA or  
581 HMCM[CG]CBCA experiments (Tugarinov & Kay, 2003) which correlate the Leu or Val  
582 methyl resonances with other side chain carbon resonances. All apo-protein samples contained 1  
583 mM EDTA. All  $Zn^{II}_2$  samples contained 2 monomer mol equiv of Zn(II). Chemical shifts were  
584 referenced to 2,2-dimethyl-2-silapentane-5-sulfonic acid (DSS; Sigma) (Wishart & Sykes, 1994).

585  $S^2_{axis}$  of the Ile  $\delta 1$ , Leu  $\delta 1/\delta 2$ , Val  $\gamma 1/\gamma 2$ , Ala  $\beta$ , and Met  $\epsilon$  methyl groups in apo  
586 and  $Zn(II)_2$  states were determined using  $^1H$  spin-based relaxation experiments at 600  
587 MHz at 35.0 °C (Tugarinov *et al.*, 2007).  $S^2_{axis}$  values, cross-correlated relaxation rates,  
588  $\eta$ , between pairs of  $^1H-^1H$  vectors in  $^{13}CH_3$  methyl groups were measured using Eq. 2

589 
$$\eta = \frac{R^F_{2,H} - R^S_{2,H}}{2} \approx \frac{9}{10} \left( \frac{\mu_o}{4\pi} \right)^2 [P_2(\cos\theta_{axis,HH})]^2 \frac{S^2_{axis} \gamma_H^4 \hbar^2 \tau_c}{r_{HH}^6} \quad (2)$$

590 where  $\tau_c$  is the tumbling time of the protein;  $R^F_{2,H}$  and  $R^S_{2,H}$  are the fast and slow relaxing  
591 magnetization, respectively;  $\gamma_H$  is the gyromagnetic ratio of the proton; and  $r_{HH}$  is the  
592 distance between pairs of methyl protons.

593 In order to obtain an approximation of the differences in fast and slow relaxation rates ( $2\eta$ ,  
594 we measured the time-dependence of the cross peak intensities in a correlated pair of single and  
595 double quantum (2Q) experiments (Tugarinov *et al.*, 2007). Using various delay time,  $T$ , values  
596 (3, 5, 8, 12, 17, 22, and 27 ms, recorded in an interleaved manner), the rates of  $\eta$  were obtained by  
597 fitting ratios of peak intensities measured in pairs of experiments ( $I_a$  and  $I_b$ , spin-forbidden and  
598 spin-allowed, respectively) with Eq. 3:

599 
$$I_a/I_b = \frac{-0.5\eta \tanh(\sqrt{\eta^2 + \delta^2}T)}{\sqrt{\eta^2 + \delta^2} - \delta \tanh(\sqrt{\eta^2 + \delta^2}T)} \quad (3)$$

600 where  $T$  is the variable delay time,  $\delta$  is a parameter that is related to the  $^1\text{H}$  spin density around the  
601 methyl group, and  $I_a$  and  $I_b$  are the time dependencies of differences and sums, respectively, of  
602 magnetization derived from methyl  $^1\text{H}$  single-quantum transitions, as described (Tugarinov *et al.*,  
603 2007). Peak heights and spectral noise were measured in Sparky (Lee *et al.*, 2015). A python script  
604 was used to fit the peak height ratios to  $\eta$  values and to determine  $S^2_{\text{axis}}$  values in the apo- or Zn-  
605 bound states, as described previously (Tugarinov & Kay, 2004, Tugarinov *et al.*, 2007, Capdevila  
606 *et al.*, 2017a).  $\tau_c$  was obtained from Monte Carlo simulations with tensor2 software (Dosset *et al.*,  
607 2000), using  $T_1$ ,  $T_2$ , and heteronuclear NOE (hNOE) recorded at 35 °C at 800 MHz, in 10% D<sub>2</sub>O.  
608 To enable a direct comparison of each AdcR allosteric state while overcoming the difficulty of  
609 determining an isotropic  $\tau_c$  from tensor2 for apo-AdcR (which harbors dynamically independent  
610 domains), the measured  $\tau_c$  for each state was obtained by adjusting  $S^2_{\text{axis}}$  of alanine methyls to 0.85  
611 since these methyl groups are generally motionally restricted in proteins (Igumenova *et al.*, 2006).  
612 For apo- and Zn<sup>II</sup><sub>2</sub> AdcRs, the  $\tau_c$  obtained in this way is  $18.9 \pm 0.1$  ns and  $20.7 \pm 0.1$  ns respectively.

613 Relaxation dispersion measurements were acquired using a TROSY adaptation of  
614  $^{15}\text{N}$  and a  $^1\text{H}$ - $^{13}\text{C}$  HMQC-based Carr–Purcell–Meiboom–Gill (CPMG) pulse sequence for  
615 amides from the backbone (Tollinger *et al.*, 2001) and methyl groups from the sidechains  
616 (Korzhnev *et al.*, 2004), respectively. Experiments were performed at 35 °C at 600 and  
617 800 MHz  $^1\text{H}$  frequencies using constant time interval  $T=40$  ms with CPMG field  
618 strengths ( $v_{\text{CPMG}}$ ) of 50, 100, 150, 200, 250, 300, 350, 400, 450, 500, 600, 700, 850, and  
619 1,000 Hz. Data were fitted to the two-site fast exchange limit equation, as discussed  
620 previously (Capdevila *et al.*, 2017a). These experiments were performed on duplicate at  
621 the two field strengths.

622

623 **DNA binding experiments and determination of allosteric coupling free energies ( $\Delta G_c$ ).**

624 For all DNA binding experiments a 28 bp double stranded DNA was obtained as previously  
625 described (Reyes-Caballero *et al.*, 2010) with the following sequence of the AdcO: 5'-  
626 TGATATAATTAACTGGTAAA CAAA ATGT[F]-3'. Apo AdcR binding experiments were  
627 conducted in solution conditions of 10 mM HEPES, pH 7.0, 0.23 M NaCl, 1 mM TCEP  
628 (chelexed), 10 nM DNA, 25.0 °C with 2.0 mM EDTA (for apo-AdcR) or 20  $\mu$ M ZnCl<sub>2</sub> (for Zn<sup>II</sup><sub>2</sub>  
629 AdcR) added to these reactions. Anisotropy experiments were performed on an ISS PC1  
630 spectrofluorometer in steady-state mode with Glan-Thompson polarizers in the L-format. The  
631 excitation wavelength was set at 494 nm with a 1 mm slit and the total emission intensity  
632 collected through a 515 nm filter. For Zn(II)-bound-AdcR DNA-binding experiments, the data  
633 were fit with DynaFit (Kuzmic, 1996) using a non-dissociable dimer 1:1 dimer:DNA binding  
634 model ( $K_{dim} = 10^{12} \text{ M}^{-1}$ ). For Zn(II)-bound experiments, the initial anisotropy ( $r_0$ ) was fixed to  
635 the measured value for the free DNA, with the anisotropy response of the saturated protein:DNA  
636 complex ( $r_{complex}$ ) optimized during a nonlinear least squares fit using DynaFit (Kuzmic, 1996).  
637 Apo binding data were fit in the same manner, except  $r_{complex}$  was fixed to reflect the anisotropy  
638 change ( $r_{complex} - r_0$ ) observed for wild-type AdcR in the presence of zinc. The errors on  $K_{apo,DNA}$   
639 and  $K_{Zn,DNA}$ , reflect the standard deviation of 3 independent titrations (Table S2). The coupling  
640 free energies were calculated using the following equation:  $\Delta G_c = -RT \ln(K_{Zn,DNA} / K_{apo,DNA})$   
641 (Giedroc & Arunkumar, 2007). Negative values of  $\Delta G_c$  were observed since AdcR is a positive  
642 allosteric activator in the presence of Zn<sup>II</sup> ( $K_{apo,DNA} < K_{Zn,DNA}$ ).

643

644 **Acknowledgements**

645 We gratefully acknowledge support of this work by the NIH (R35 GM118157 to D. P. G.).  
646 NMR instrumentation in the METACyt Biomolecular NMR Laboratory at Indiana University  
647 was generously supported by a grant from the Lilly Endowment. D.A.C. acknowledges support  
648 from the Pew Latin American Fellows Program in the Biomedical Sciences. We also thank Dr.  
649 Lixin Fan of the Small-Angle X-ray Scattering Core Facility, National Cancer Institute,  
650 Frederick, MD for acquiring the SAXS data.

651

652

## 653 References

- 654 Alekshun MN, Levy SB. 1999. Characterization of MarR superrepressor mutants. *J Bacteriol.*  
655 181:3303-3306.
- 656 Alekshun MN, Levy SB. 2007. Molecular mechanisms of antibacterial multidrug resistance.  
657 *Cell.* 128:1037-1050.
- 658 Alekshun MN, Levy SB, Mealy TR, Seaton BA, Head JF. 2001. The crystal structure of MarR, a  
659 regulator of multiple antibiotic resistance, at 2.3 Å resolution. *Nat Struct Biol.* 8:710-714.
- 660 Anandapadamanaban M, Pilstål R, Andresen C, Trehwella J, Moche M, Wallner B, Sunnerhagen  
661 M. 2016. Mutation-induced population shift in the MexR conformational ensemble  
662 disengages DNA binding: A novel mechanism for MarR family derepression. *Structure.*  
663 24:1311-1321.
- 664 Anderson KM, Esadze A, Manoharan M, Brüsweiler R, Gorenstein DG, Iwahara J. 2013.  
665 Direct observation of the ion-pair dynamics at a protein–DNA interface by NMR  
666 spectroscopy. *J Am Chem Soc.* 135:3613-3619.
- 667 Andresen C, Jalal S, Aili D, Wang Y, Islam S, Jarl A, Liedberg B, Wretling B, Martensson LG,  
668 Sunnerhagen M. 2010. Critical biophysical properties in the *Pseudomonas aeruginosa*  
669 efflux gene regulator MexR are targeted by mutations conferring multidrug resistance.  
670 *Protein Sci.* 19:680-692.
- 671 Aranda J, Garrido ME, Fittipaldi N, Cortes P, Llagostera M, Gottschalk M, Barbe J. 2009.  
672 Protective capacities of cell surface-associated proteins of *Streptococcus suis* mutants  
673 deficient in divalent cation-uptake regulators. *Microbiology.* 155:1580-1587.
- 674 Arunkumar AI, Pennella MA, Kong X, Giedroc DP. 2007. Resonance assignments of the metal  
675 sensor CzrA in the apo-, Zn<sub>2</sub>- and DNA-bound (42 kDa) states. *Biomol NMR Assign.*  
676 1:99-101.
- 677 Birukou I, Seo SM, Schindler BD, Kaatz GW, Brennan RG. 2014. Structural mechanism of  
678 transcription regulation of the *Staphylococcus aureus* multidrug efflux operon *mepRA* by  
679 the MarR family repressor MepR. *Nucleic Acids Res.* 42:2774-2788.
- 680 Bordelon T, Wilkinson SP, Grove A, Newcomer ME. 2006. The crystal structure of the  
681 transcriptional regulator HucR from *Deinococcus radiodurans* reveals a repressor  
682 preconfigured for DNA binding. *J Mol Biol.* 360:168-177.
- 683 Campanello GC, Ma Z, Grosseohme NE, Guerra AJ, Ward BP, Dimarchi RD, Ye Y, Dann III  
684 CE, Giedroc DP. 2013. Allosteric inhibition of a zinc-sensing transcriptional repressor:  
685 Insights into the arsenic repressor (ArsR) family. *J Mol Biol.* 425:1143-1157.
- 686 Campbell E, Kaltenbach M, Correy GJ, Carr PD, Porebski BT, Livingstone EK, Afriat-Jurnou L,  
687 Buckle AM, Weik M, Hoffelder F, Tokuriki N, Jackson CJ. 2016. The role of protein  
688 dynamics in the evolution of new enzyme function. *Nat Chem Biol.* 12:944-950.
- 689 Capdevila DA, Braymer JJ, Edmonds KA, Wu H, Giedroc DP. 2017a. Entropy redistribution  
690 controls allostery in a metalloregulatory protein. *Proc Natl Acad Sci U S A.* 114:4424-  
691 4429.
- 692 Capdevila DA, Edmonds KA, Giedroc DP. 2017b. Metallochaperones and metalloregulation in  
693 bacteria. *Essays Biochem.* 61:177-200.
- 694 Caro JA, Harpole KW, Kasinath V, Lim J, Granja J, Valentine KG, Sharp KA, Wand AJ. 2017.  
695 Entropy in molecular recognition by proteins. *Proc Natl Acad Sci U S A.* 114:6563-6568.
- 696 Chakravorty DK, Parker TM, Guerra AJ, Sherrill CD, Giedroc DP, Merz KM, Jr. 2013.  
697 Energetics of zinc-mediated interactions in the allosteric pathways of metal sensor  
698 proteins. *J Am Chem Soc.* 135:30-33.

- 699 Chang YM, Jeng WY, Ko TP, Yeh YJ, Chen CK, Wang AH. 2010. Structural study of TcaR and  
700 its complexes with multiple antibiotics from *Staphylococcus epidermidis*. Proc Natl Acad  
701 Sci U S A. 107:8617-8622.
- 702 Chen PR, Bae T, Williams WA, Duguid EM, Rice PA, Schneewind O, He C. 2006. An  
703 oxidation-sensing mechanism is used by the global regulator MgrA in *Staphylococcus*  
704 *aureus*. Nat Chem Biol. 2:591-595.
- 705 Chin KH, Tu ZL, Li JN, Chou CC, Wang AH, Chou SH. 2006. The crystal structure of XC1739:  
706 a putative multiple antibiotic-resistance repressor (MarR) from *Xanthomonas campestris*  
707 at 1.8 Å resolution. Proteins. 65:239-242.
- 708 Clarke D, Sethi A, Li S, Kumar S, Chang RW, Chen J, Gerstein M. 2016. Identifying allosteric  
709 hotspots with dynamics: Application to inter- and intra-species conservation. Structure.  
710 24:826-837.
- 711 Cohen SP, Hachler H, Levy SB. 1993. Genetic and functional analysis of the multiple antibiotic  
712 resistance (*mar*) locus in *Escherichia coli*. J Bacteriol. 175:1484-1492.
- 713 Delaglio F, Grzesiek S, Vuister GW, Zhu G, Pfeifer J, Bax A. 1995. NMRPipe: A  
714 multidimensional spectral processing system based on UNIX pipes. J Biomol NMR.  
715 6:277-293.
- 716 Deochand DK, Grove A. 2017. MarR family transcription factors: Dynamic variations on a  
717 common scaffold. Crit Rev Biochem Mol Biol. 52:595-613.
- 718 Deochand DK, Perera IC, Crochet RB, Gilbert NC, Newcomer ME, Grove A. 2016. Histidine  
719 switch controlling pH-dependent protein folding and DNA binding in a transcription  
720 factor at the core of synthetic network devices. Mol BioSyst. 12:2417-2426.
- 721 Dolan KT, Duguid EM, He C. 2011. Crystal structures of SlyA protein, a master virulence  
722 regulator of *Salmonella*, in free and DNA-bound states. J Biol Chem. 286:22178-22185.
- 723 Dosset P, Hus JC, Blackledge M, Marion D. 2000. Efficient analysis of macromolecular  
724 rotational diffusion from heteronuclear relaxation data. J Biomol NMR. 16:23-28.
- 725 Duval V, McMurry LM, Foster K, Head JF, Levy SB. 2013. Mutational analysis of the multiple-  
726 antibiotic resistance regulator *marR* reveals a ligand binding pocket at the interface  
727 between the dimerization and DNA binding domains. J Bacteriol. 195:3341-3351.
- 728 Ellison DW, Miller VL. 2006. Regulation of virulence by members of the MarR/SlyA family.  
729 Curr Opin Microbiol. 9:153-159.
- 730 Franke D, Svergun DI. 2009. DAMMIF, a program for rapid *ab-initio* shape determination in  
731 small-angle scattering. J Appl Crystallogr. 42:342-346.
- 732 Frederick KK, Marlow MS, Valentine KG, Wand AJ. 2007. Conformational entropy in  
733 molecular recognition by proteins. Nature. 448:325-329.
- 734 Fuangthong M, Helmann JD. 2002. The OhrR repressor senses organic hydroperoxides by  
735 reversible formation of a cysteine-sulfenic acid derivative. Proc Natl Acad Sci U S A.  
736 99:6690-6695.
- 737 Gao YR, Li DF, Fleming J, Zhou YF, Liu Y, Deng JY, Zhou L, Zhou J, Zhu GF, Zhang XE,  
738 Wang DC, Bi LJ. 2017. Structural analysis of the regulatory mechanism of MarR protein  
739 Rv2887 in *M. tuberculosis*. Sci Rep. 7:6471.
- 740 Giedroc DP, Arunkumar AI. 2007. Metal sensor proteins: Nature's metalleregulated allosteric  
741 switches. Dalton Trans. 29:3107-3120.
- 742 Goddard TD, Kneller DG, Sparky 3. University of California, San Francisco.
- 743 Grove A. 2013. MarR family transcription factors. Curr Biol. 23:R142-R143.
- 744 Grove A. 2017. Regulation of metabolic pathways by MarR family transcription factors. Comput  
745 Struct Biotechnol J. 15:366-371.

- 746 Guerra AJ, Dann CE, Giedroc DP. 2011. Crystal structure of the zinc-dependent MarR family  
747 transcriptional regulator AdcR in the Zn(II)-bound state. *J Am Chem Soc.* 133:19614-  
748 19617.
- 749 Guerra AJ, Giedroc DP. 2014. Backbone and stereospecific methyl side chain resonance  
750 assignments of the homodimeric zinc sensor AdcR (32 kDa) in the apo- and Zn(II)-bound  
751 states. *Biomol NMR Assign.* 8:11-14.
- 752 Gupta A, Grove A. 2014. Ligand-binding pocket bridges DNA-binding and dimerization  
753 domains of the urate-responsive MarR homologue MftR from *Burkholderia*  
754 *thailandensis*. *Biochemistry.* 53:4368-4380.
- 755 Hao Z, Lou H, Zhu R, Zhu J, Zhang D, Zhao BS, Zeng S, Chen X, Chan J, He C, Chen PR.  
756 2013. The multiple antibiotic resistance regulator MarR is a copper sensor in *Escherichia*  
757 *coli*. *Nat Chem Biol.* 10:21-28.
- 758 Hong M, Fuangthong M, Helmann JD, Brennan RG. 2005. Structure of an OhrR-ohrA operator  
759 complex reveals the DNA binding mechanism of the MarR family. *Mol Cell.* 20:131-141.
- 760 Hyberts SG, Milbradt AG, Wagner AB, Arthanari H, Wagner G. 2012. Application of iterative  
761 soft thresholding for fast reconstruction of NMR data non-uniformly sampled with  
762 multidimensional Poisson Gap scheduling. *J Biomol NMR.* 52:315-327.
- 763 Igumenova TI, Frederick KK, Wand AJ. 2006. Characterization of the fast dynamics of protein  
764 amino acid side chains using NMR relaxation in solution. *Chem Rev.* 106:1672-1699.
- 765 Kalodimos CG, Biris N, Bonvin AM, Levandoski MM, Guennuegues M, Boelens R, Kaptein R.  
766 2004. Structure and flexibility adaptation in nonspecific and specific protein-DNA  
767 complexes. *Science.* 305:386-389.
- 768 Kim Y, Joachimiak G, Bigelow L, Babnigg G, Joachimiak A. 2016. How aromatic compounds  
769 block DNA binding of HcaR catabolite regulator. *J Biol Chem.* 291:13243-13256.
- 770 Korzhnev DM, Kloiber K, Kanelis V, Tugarinov V, Kay LE. 2004. Probing slow dynamics in  
771 high molecular weight proteins by methyl-TROSY NMR spectroscopy: application to a  
772 723-residue enzyme. *J Am Chem Soc.* 126:3964-3973.
- 773 Kuzmic P. 1996. Program DYNAFIT for the analysis of enzyme kinetic data: application to HIV  
774 proteinase. *Anal Biochem.* 237:260-273.
- 775 Lee W, Tonelli M, Markley JL. 2015. NRMFAM-SPARKY: enhanced software for  
776 biomolecular NMR spectroscopy. *Bioinformatics.* 31:1325-1327.
- 777 Liguori A, Malito E, Lo Surdo P, Fagnocchi L, Cantini F, Haag AF, Brier S, Pizza M, Delany I,  
778 Bottomley MJ. 2016. Molecular basis of ligand-dependent regulation of NadR, the  
779 transcriptional repressor of meningococcal virulence factor NadA. *PLoS Pathog.*  
780 12:e1005557.
- 781 Liu G, Liu X, Xu H, Liu X, Zhou H, Huang Z, Gan J, Chen H, Lan L, Yang CG. 2017. Structural  
782 insights into the redox-sensing mechanism of MarR-type regulator AbfR. *J Am Chem*  
783 *Soc.* 139:1598-1608.
- 784 Llull D, Son O, Blanie S, Briffotiaux J, Morello E, Rogniaux H, Danot O, Poquet I. 2011.  
785 *Lactococcus lactis* ZitR is a zinc-responsive repressor active in the presence of low,  
786 nontoxic zinc concentrations in vivo. *J Bacteriol.* 193:1919-1929.
- 787 Loo CY, Mitrakul K, Voss IB, Hughes CV, Ganeshkumar N. 2003. Involvement of the *adc*  
788 operon and manganese homeostasis in *Streptococcus gordonii* biofilm formation. *J*  
789 *Bacteriol.* 185:2887-2900.
- 790 Marijuan PC, Navarro J, del Moral R. 2010. On prokaryotic intelligence: strategies for sensing  
791 the environment. *Biosystems.* 99:94-103.



- 792 Motlagh HN, Wrabl JO, Li J, Hilser VJ. 2014. The ensemble nature of allostery. *Nature*.  
793 508:331-339.
- 794 Otani H, Stogios PJ, Xu X, Nocek B, Li SN, Savchenko A, Eltis LD. 2016. The activity of  
795 CouR, a MarR family transcriptional regulator, is modulated through a novel molecular  
796 mechanism. *Nucleic Acids Res*. 44:595-607.
- 797 Pabis A, Risso VA, Sanchez-Ruiz JM, Kamerlin SC. 2018. Cooperativity and flexibility in  
798 enzyme evolution. *Curr Opin Struct Biol*. 48:83-92.
- 799 Peng H, Zhang Y, Palmer LD, Kehl-Fie TE, Skaar EP, Trinidad JC, Giedroc DP. 2017.  
800 Hydrogen sulfide (H<sub>2</sub>S) and reactive sulfur species (RSS) impact proteome S-  
801 sulfhydrylation and global virulence regulation in *Staphylococcus aureus*. *ACS Infect*  
802 *Dis*.3:744-755.
- 803 Perera IC, Grove A. 2010. Molecular mechanisms of ligand-mediated attenuation of DNA  
804 binding by MarR family transcriptional regulators. *J Mol Cell Biol*. 2:243-254.
- 805 Perez-Rueda E, Collado-Vides J, Segovia L. 2004. Phylogenetic distribution of DNA-binding  
806 transcription factors in bacteria and archaea. *Comput Biol Chem*. 28:341-350.
- 807 Quade N, Mendonca C, Herbst K, Heroven AK, Ritter C, Heinz DW, Dersch P. 2012. Structural  
808 basis for intrinsic thermosensing by the master virulence regulator RovA of *Yersinia*. *J*  
809 *Biol Chem*. 287:35796-35803.
- 810 Radhakrishnan A, Kumar N, Wright CC, Chou TH, Tringides ML, Bolla JR, Lei HT,  
811 Rajashankar KR, Su CC, Purdy GE, Yu EW. 2014. Crystal structure of the transcriptional  
812 regulator Rv0678 of *Mycobacterium tuberculosis*. *J Biol Chem*. 289:16526-16540.
- 813 Reyes-Caballero H, Guerra AJ, Jacobsen FE, Kazmierczak KM, Cowart D, Koppolu UM, Scott  
814 RA, Winkler ME, Giedroc DP. 2010. The metalloregulatory zinc site in *Streptococcus*  
815 *pneumoniae* AdcR, a zinc-activated MarR family repressor. *J Mol Biol*. 403:197-216.
- 816 Sanson M, Makthal N, Flores AR, Olsen RJ, Musser JM, Kumaraswami M. 2015. Adhesin  
817 competence repressor (AdcR) from *Streptococcus pyogenes* controls adaptive responses  
818 to zinc limitation and contributes to virulence. *Nucleic Acids Res*. 43:418-432.
- 819 Saridakis V, Shahinas D, Xu X, Christendat D. 2008. Structural insight on the mechanism of  
820 regulation of the MarR family of proteins: high-resolution crystal structure of a  
821 transcriptional repressor from *Methanobacterium thermoautotrophicum*. *J Mol Biol*.  
822 377:655-667.
- 823 Schneidman-Duhovny D, Hammel M, Sali A. 2010. FoXS: a web server for rapid computation  
824 and fitting of SAXS profiles. *Nucleic Acids Res*. 38:W540-544.
- 825 Seoane AS, Levy SB. 1995. Characterization of MarR, the repressor of the multiple antibiotic  
826 resistance (*mar*) operon in *Escherichia coli*. *J Bacteriol*. 177:3414-3419.
- 827 Shen Y, Delaglio F, Cornilescu G, Bax A. 2009. TALOS+: a hybrid method for predicting  
828 protein backbone torsion angles from NMR chemical shifts. *J Biomol NMR*. 44:213-223.
- 829 Sun F, Ding Y, Ji Q, Liang Z, Deng X, Wong CC, Yi C, Zhang L, Xie S, Alvarez S, Hicks LM,  
830 Luo C, Jiang H, Lan L, He C. 2012. Protein cysteine phosphorylation of SarA/MgrA  
831 family transcriptional regulators mediates bacterial virulence and antibiotic resistance.  
832 *Proc Natl Acad Sci U S A*. 109:15461-15466.
- 833 Takano H, Mise K, Maruyama T, Hagiwara K, Ueda K. 2016. Role of the semi-conserved  
834 histidine residue in the light-sensing domain of LitR, a MerR-type photosensory  
835 transcriptional regulator. *Microbiology*. 162:1500-1509.
- 836 Tamber S, Cheung AL. 2009. SarZ promotes the expression of virulence factors and represses  
837 biofilm formation by modulating SarA and *agr* in *Staphylococcus aureus*. *Infect Immun*.  
838 77:419-428.

- 839 Tollinger M, Skrynnikov NR, Mulder FAA, Forman-Kay JD, Kay LE. 2001. Slow dynamics in  
840 folded and unfolded states of an SH3 domain. *J Am Chem Soc.* 123:11341-11352.
- 841 Tugarinov V, Kay LE. 2003. Ile, Leu, and Val methyl assignments of the 723-Residue malate  
842 synthase G using a new labeling strategy and novel NMR methods. *J Am Chem Soc*  
843 125:13868-13878.
- 844 Tugarinov V, Kay LE. 2004.  $^1\text{H}$ ,  $^{13}\text{C}$ - $^1\text{H}$ ,  $^1\text{H}$  dipolar cross-correlated spin relaxation in methyl  
845 groups. *J Biomol NMR.* 29:369-376.
- 846 Tugarinov V, Sprangers R, Kay LE. 2007. Probing side-chain dynamics in the proteasome by  
847 relaxation violated coherence transfer NMR spectroscopy. *J Am Chem Soc.* 129:1743-  
848 1750.
- 849 Tzeng SR, Kalodimos CG. 2009. Dynamic activation of an allosteric regulatory protein. *Nature.*  
850 462:368-372.
- 851 Tzeng SR, Kalodimos CG. 2012. Protein activity regulation by conformational entropy. *Nature.*  
852 488:236-240.
- 853 Tzeng SR, Kalodimos CG. 2013. Allosteric inhibition through suppression of transient  
854 conformational states. *Nat Chem Biol.* 9:462-465.
- 855 Ulrich LE, Koonin EV, Zhulin IB. 2005. One-component systems dominate signal transduction  
856 in prokaryotes. *Trends Microbiol.* 13:52-56.
- 857 Weatherspoon-Griffin N, Wing HJ. 2016. Characterization of SlyA in *Shigella flexneri* identifies  
858 a novel role in virulence. *Infect Immun.* 84:1073-1082.
- 859 West AL, Evans SE, Gonzalez JM, Carter LG, Tsuruta H, Pozharski E, Michel SL. 2012. Ni(II)  
860 coordination to mixed sites modulates DNA binding of HpNikR via a long-range effect.  
861 *Proc Natl Acad Sci U S A.* 109:5633-5638.
- 862 Wilke MS, Heller M, Creagh AL, Haynes CA, McIntosh LP, Poole K, Strynadka NCJ. 2008.  
863 The crystal structure of MexR from *Pseudomonas aeruginosa* in complex with its  
864 antirepressor ArmR. *Proc Natl Acad Sci U S A.* 105:14832-14837.
- 865 Wishart DS, Sykes BD. 1994. Chemical shifts as a tool for structure determination. *Methods*  
866 *Enzymol.* 239:363-392.
- 867 Yoon H, McDermott JE, Porwollik S, McClelland M, Heffron F. 2009. Coordinated regulation  
868 of virulence during systemic infection of *Salmonella enterica* serovar Typhimurium.  
869 *PLoS Pathog.* 5:e1000306.
- 870 Zhu R, Hao Z, Lou H, Song Y, Zhao J, Chen Y, Zhu J, Chen PR. 2017a. Structural  
871 characterization of the DNA-binding mechanism underlying the copper(II)-sensing MarR  
872 transcriptional regulator. *J Biol Inorg Chem.* 22:685-693.
- 873 Zhu R, Hao Z, Lou H, Song Y, Zhao J, Zhu J, Chen PR. 2017b. Structural and mechanistic study  
874 of the cysteine oxidation-mediated induction of the *Escherichia coli* MarR regulator.  
875 *Tetrahedron.* 73:3714-3719.
- 876 Zhu R, Song Y, Liu H, Yang Y, Wang S, Yi C, Chen PR. 2017c. Allosteric histidine switch for  
877 regulation of intracellular zinc(II) fluctuation. *Proc Natl Acad Sci U S A.* 114:13661-  
878 13666.
- 879

880

881 **Figure Legends**

882  
883

884 **Figure 1.** (a) Ribbon representation of dimeric Zn(II)-bound AdcR, with one protomer shaded  
885 white and the other shaded *light blue* (PDB-ID: 3tgn) (Guerra *et al.*, 2011). The two Zn(II) ions  
886 in each protomer are represented by spheres, and coordinating ligands are shown in stick  
887 representation. The DNA binding helices are shaded *red*. (b) Simplified free energy diagram  
888 showing of the active (*green*) and inactive (*blue*) states the relative population of two distinct  
889 conformations: compatible with DNA binding (*red* rectangle,  $\alpha 4$ - $\alpha 4'$  distance between DNA  
890 binding helices,  $\approx 30$  Å) and incompatible with DNA binding (larger  $\alpha 4$ - $\alpha 4'$  distances). (c) The  
891  $\alpha 4$ - $\alpha 4'$  distance distribution plotted against the DNA-binding inter-helical  $\alpha 4$ - $\alpha 4'$  orientation  
892 distribution for all the reported MarR crystal structures (see Table S1 for details) in the  
893 allosterically “active” DNA-binding conformation (*green*), an “inactive” conformation (*blue*)  
894 and in the DNA-bound (*red*) conformation. The inferred conformational space occupied by the  
895 DNA-bound conformation in all MarR regulators (Table S1) is shaded in *red* oval. Ribbon  
896 representation of the molecules in each conformation are shown in the inset, as well as a scheme  
897 of how the distances and angles were measured. (d) Histogram plot of the  $\alpha 4$ - $\alpha 4'$  distance (see  
898 panel c) extracted from 136 different crystal structures of MarR repressors in the DNA-binding-  
899 “inactive”, DNA-binding “active” and DNA-bound conformations.

900

901 **Figure 2.** (a) Small angle X-ray scattering (SAXS) curve of AdcR in apo- and Zn<sub>2</sub>-states, with a  
902 curve calculated from the previously published AdcR-Zn<sub>2</sub> structure (Fig. 1A, PDB-ID: 3tgn)  
903 (Guerra *et al.*, 2011). Best-fit DAMMIF *ab initio* model (Franke & Svergun, 2009) for apo- (b)  
904 (*blue*) and Zn<sup>II</sup><sub>2</sub>-states (c) (*green*), aligned with the ribbon representation of the Zn<sup>II</sup><sub>2</sub> structure

905 (Fig. 1A, PDB-ID: 3tgn). The corresponding Guinier, Kratky and pairwise distribution  
906 histogram plots are shown in Fig. S2, along with the fitting parameters.

907

908 **Figure 3.** Chemical shift perturbation maps for  $Zn^{II}$  binding to AdcR for the backbone (a) and  
909 the stereospecifically assigned methyl groups (b) at pH 5.5, 50 mM NaCl, 35 °C. CSPs are  
910 painted on the ribbon representation of the structure of  $Zn^{II}_2$  AdcR. The shaded bar in each case  
911 represents one standard deviation from the mean perturbation. Site 1 and site 2 ligands in the  
912 primary structure in panel (a) are denoted by the *yellow* and *green* circles, respectively; the  
913 asterisks at residue positions 21 and 38-40 indicate no assignment in the apo-state (see Materials  
914 and Methods). (c) Distribution of  $\alpha 1$ - $\alpha 2$  loops lengths in the reported structures in all MarR  
915 family of proteins (see Table S1 for an accounting of these structures). A postulated schematic  
916 representation of allosteric inhibition and activation are shown (*inset*), with shorter  $\alpha 1$ - $\alpha 2$  loops  
917 driving allosteric inhibition of the DNA binding upon ligand binding, and longer loops  
918 associated with allosteric activation (like that for AdcR/ZitR) upon ligand binding.

919

920 **Figure 4.** Dynamical characterization of the apo- (a) (c) (e) and  $Zn^{II}_2$  (b) (d) (f) AdcR  
921 conformational states. Backbone  $^1H$ - $^{15}N$  amide  $R_2/R_1$  for apo- (a) and  $Zn^{II}_2$  AdcR (b) painted  
922 onto the 3tgn structure (Guerra *et al.*, 2011). Heteronuclear NOE analysis of apo- (c) and  $Zn^{II}_2$   
923 (d) AdcR with the values of the  $^{15}N$ - $\{^1H\}$ -NOE (hNOE) painted onto the 3tgn structure. Values  
924 of  $R_{ex}$  determined from HSQC  $^{15}N$ - $^1H$  CPMG relaxation dispersion experiments at a field of 600  
925 MHz for the apo- (e) and  $Zn^{II}_2$  (f) AdcRs (see Fig. S6 for complete data). Similar results were  
926 obtained at 800 MHz (Fig. S6).  $Zn^{II}$  ions are shown as black spheres and residues excluded due  
927 to overlapped are shown in gray and yellow. The width of the ribbon reflects the value  
928 represented in the color bar.

929

930 **Figure 5.** Effect of Zn<sup>II</sup> binding to AdcR on the site-specific stereospecifically assigned methyl  
931 group axial order parameter,  $S^2_{\text{axis}}$  (a) and  $R_{\text{ex}}$  (b) plotted as  $\Delta S^2_{\text{axis}}$  ( $S^2_{\text{axis}}^{\text{Zn}} - S^2_{\text{axis}}^{\text{apo}}$ ) and  $\Delta R_{\text{ex}}$   
932 ( $R_{\text{ex}}^{\text{Zn}} - R_{\text{ex}}^{\text{apo}}$ ) values, respectively, mapped onto the structure of Zn<sup>II</sup><sub>2</sub> AdcR (3tgn). A  $\Delta S^2_{\text{axis}} < 0$   
933 indicates that the methyl group becomes *more* dynamic in the Zn<sup>II</sup><sub>2</sub>-bound state, while  $\Delta R_{\text{ex}} < 0$   
934 indicates quenching of motion on the  $\mu\text{s}$ -ms timescale in the in the Zn<sup>II</sup><sub>2</sub>-bound state. See Fig. S5  
935 for a graphical representation of all  $S^2_{\text{axis}}$  and  $R_{\text{ex}}$  values in each conformation from which these  
936 differences were determined, and Fig. S6 for summary of all dynamical parameters measured  
937 here. Residues harboring methyl groups that show major dynamical perturbations on Zn<sup>II</sup>  
938 binding are highlighted, with selected residues subjected to cavity mutagenesis (Fig. 6; Table  
939 S2).

940

941 **Figure 6.** Graphical summary of the functional properties of AdcR cavity and hydrogen bonding  
942 mutants. (a) Zoom of the DNA binding domain (DBD) of one of the two Zn<sup>II</sup><sub>2</sub>-bound AdcR  
943 protomers highlighting the residues targeted for mutagenesis (cavity mutants, *red stick*;  
944 hydrogen-bonding pathway mutants, *green stick*; zinc ligand E24, *yellow stick*), with the helical  
945 elements ( $\alpha 1$ - $\alpha 5$ ) indicated. (b) C $\alpha$  positions of the residues targeted for cavity mutagenesis in  
946 the DNA binding domain (DBD) (*red spheres*) and in the dimerization domain (DIM) (*blue*  
947 *spheres*); other residues targeted for substitution in the hydrogen-bonding pathway (N38, Q40;  
948 *green spheres*) and zinc ligand E24 (*yellow spheres*) highlighted on the structure of the Zn<sup>II</sup><sub>2</sub>  
949 ZitR-DNA operator complex (Zhu *et al.*, 2017c); Zn<sup>II</sup> ions (*black spheres*). (c) Coupling free  
950 energy analysis for all AdcR mutants highlighted using the same color scheme as in panels (a),  
951 (b). DBD, DNA-binding domain; DIM, dimerization domain; H-bond, hydrogen binding  
952 mutants. Lower horizontal line,  $K_{\text{DNA}}$  for wild-type apo-AdcR; upper horizontal line,  $K_{\text{DNA}}$  for

953 wild-type  $Zn^{II}_2$  AdcR, for reference. The trend in  $\Delta S_{2axis}$  and  $\Delta R_{ex}$  is qualitatively indicated  
954 (see Table S2). These residues are conserved to various degrees in AdcR-like repressors (Fig.  
955 S12).

956

957 **Figure 7.** Entropically driven model for how conformational dynamics can be harnessed to  
958 evolve allosteric activation (*upper right*) vs. allosteric inhibition (*lower right*) in the same  
959 molecular scaffold. This model suggests that dynamic properties of the active states have been  
960 conserved to give rise to a more favorable conformational entropy. In the metalloregulatory  
961 MarRs (AdcR, ZitR), the inactive state shows perturbed dynamics over a range of timescales;  
962 apo-AdcR therefore exhibits low affinity for DNA. Metal ion (*yellow circle*) coordination  
963 quenches both local and global modes in the dimerization domain and linkers, while inducing  
964 conformational disorder in the DNA-binding domain that enhances DNA binding affinity, thus  
965 stabilizing a conformation that has high affinity for DNA and giving rise to a favorable  
966 conformational entropy. For prototypical MarRs, where the ligand (*yellow star*) is an allosteric  
967 inhibitor, ligand binding narrows the conformational ensemble to a DNA-binding “inactive”  
968 conformation decreasing the enthalpic contribution to DNA binding, while perturbing fast time  
969 scale dynamics that give rise to an unfavorable conformational entropy for DNA-binding.

970

971

972

973

974

975 FIGURES

976 Figure 1

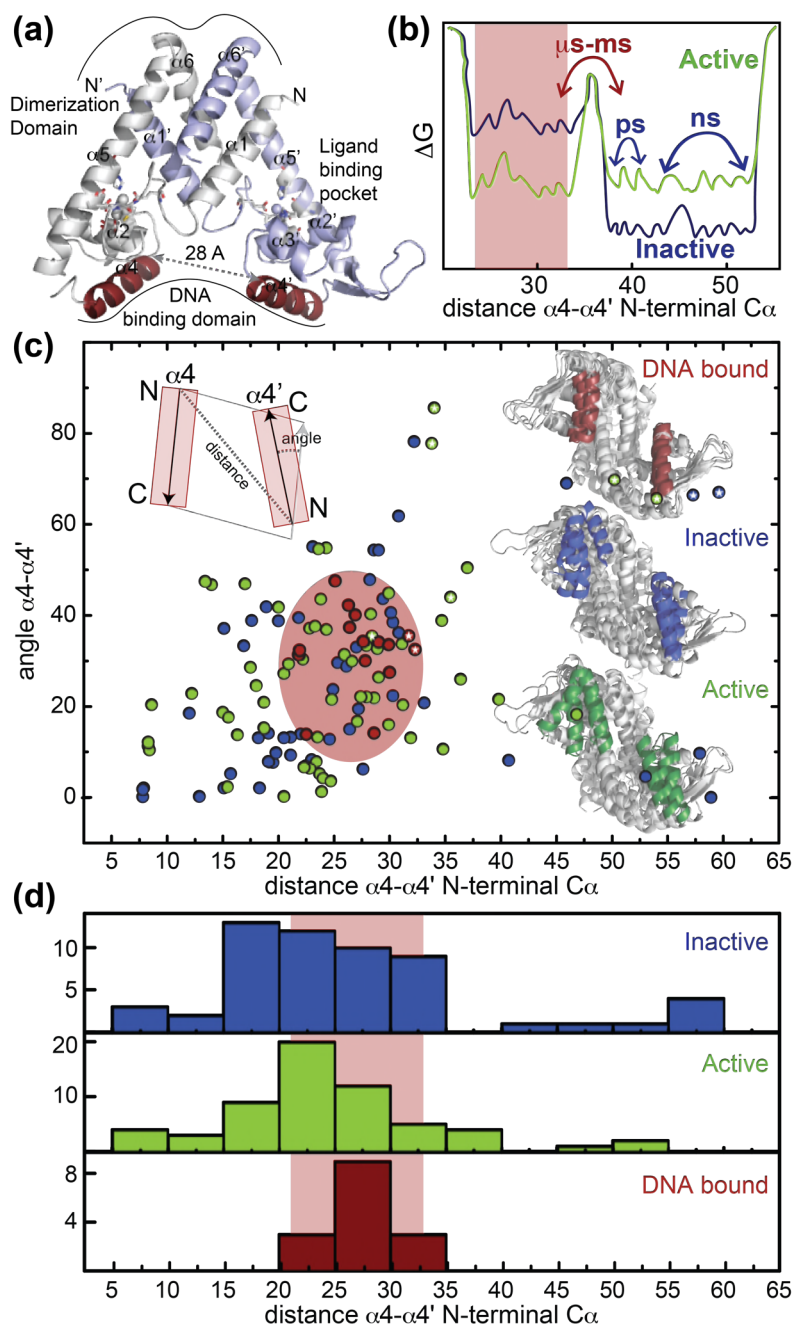

977

978 **Figure 2**

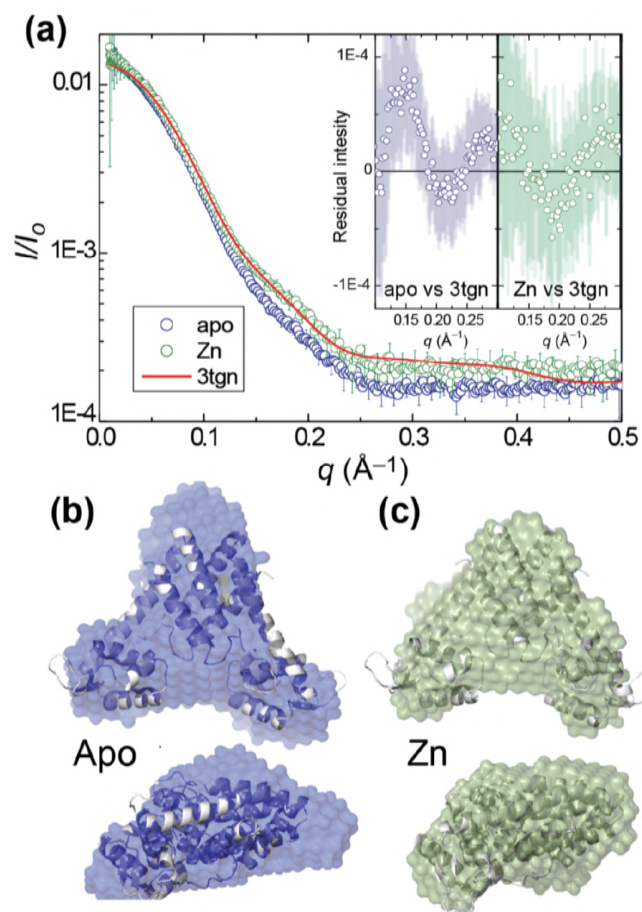



979 **Figure 3**

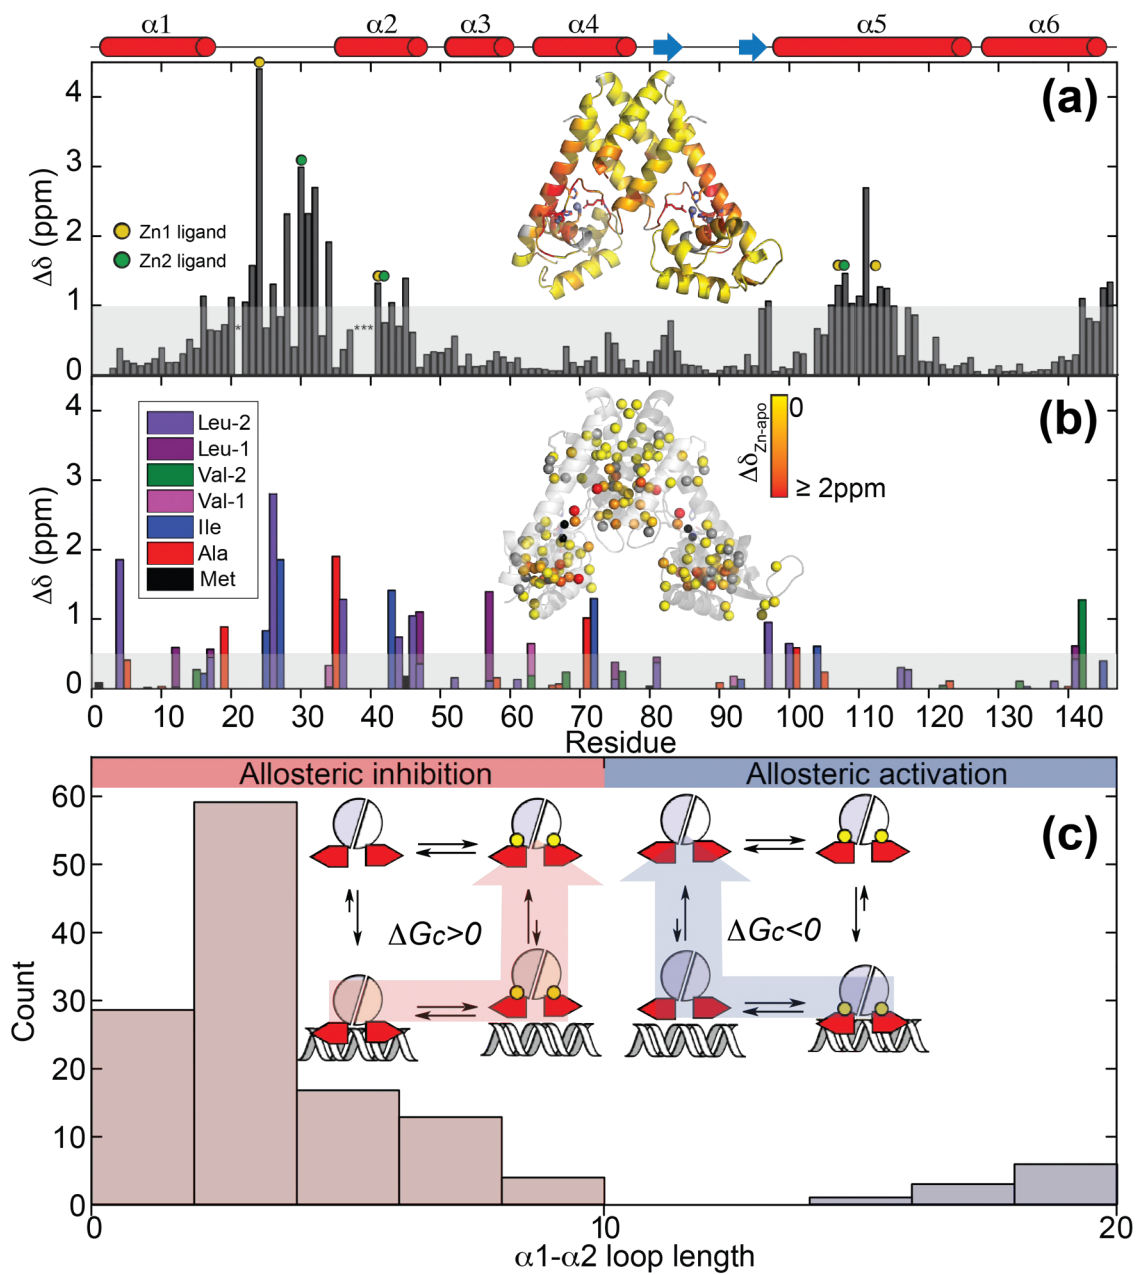

980

981 **Figure 4**

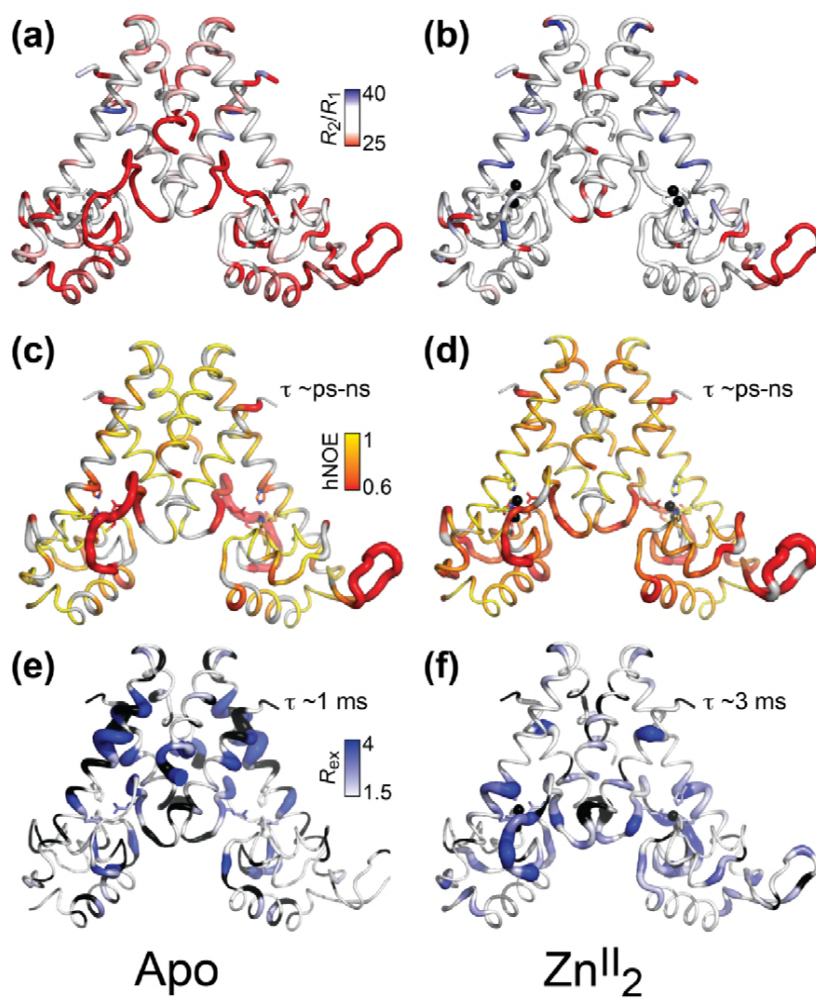

982

983

984

985 **Figure 5**

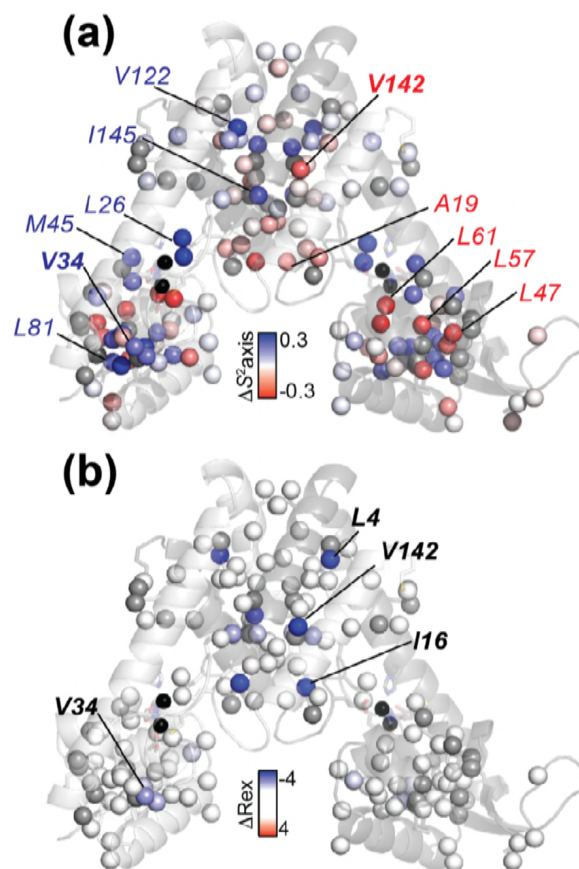

986

987

988

989 **Figure 6**

990

991

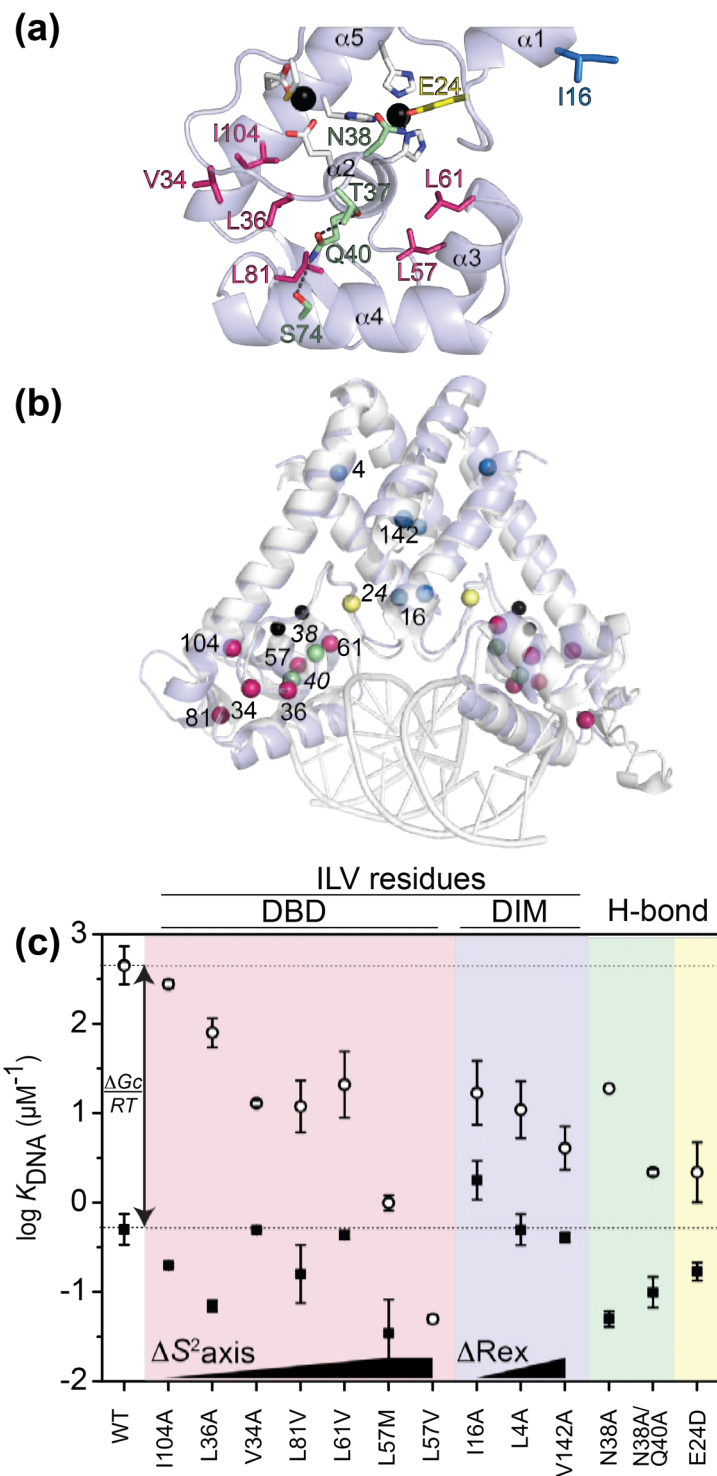

992 **Figure 7**

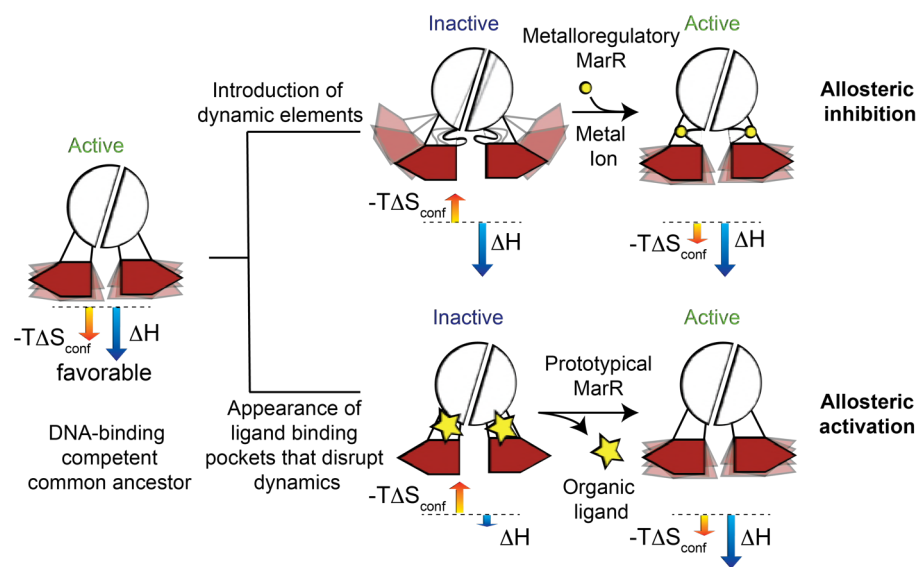

993

994

1

2 **Supplementary Data**

3

4 **Tuning site-specific dynamics to drive allosteric activation in a pneumococcal**  
5 **zinc uptake regulator**

6

7 Daiana A. Capdevila,<sup>†</sup> Fidel Huerta,<sup>†,‡</sup> Katherine A. Edmonds,<sup>†</sup> My T. Le,<sup>†</sup> Hongwei Wu,<sup>†</sup> and

8 David P. Giedroc<sup>\*,†,§</sup>

9

10 This file contains **Supplementary Tables S1-S3** and **Supplementary Figures S1-S12**.

11

12 **Table S1.** Interprotomer distances between the C $\alpha$  of the N-terminal residue in the  $\alpha$ 4 and  $\alpha$ 4'  
 13 helices

| MarR           | DNA-bound state   |               | Inhibited state <sup>a</sup>    |                               | Active state <sup>b</sup>                           |                                                         |
|----------------|-------------------|---------------|---------------------------------|-------------------------------|-----------------------------------------------------|---------------------------------------------------------|
|                | Distance (Å)      | PDB ID        | Distance (Å)                    | PDB ID                        | Distance (Å)                                        | PDB ID                                                  |
| ZitR (AdcR)    | 32.3/31.7         | 5yi2/5yi3     | 59.6/57.3                       | 5yh0/5yh1                     | 35.5/54.0/<br>50.2<br>(22.2/ 34/<br>33.8)           | 5yhx/5yhy/<br>5yhz<br>(3tgn/5jls/<br>5jlu)              |
| <i>Ec</i> MarR | 29                | 5hr3          | 12.9 / 12                       | 1jgs/4jba                     | 8.3 / 8.4                                           | 3vod/3voe                                               |
| OhrR           | 27.6              | 1z9c          | (32.2)                          | (2pfb)                        | 23.9<br>(28.9)                                      | 1z91 (2pex)                                             |
| SlyA           | 27.8              | 3q5f          | 29.4                            | 3deu                          | 15.5<br>(23.8, 20)                                  | 3qpt<br>(1lj9, 4mnu)                                    |
| AbsC           | 26.3              | 3zpl          | 30.8                            | 3zmd                          | -                                                   | -                                                       |
| RovA           | 21.8 /<br>21.9    | 4aij/<br>4aik | -                               | -                             | 20.9                                                | 4aih                                                    |
| MosR           | 25.1              | 4fx4          | 15.1                            | 4fx0                          | -                                                   | -                                                       |
| MepR           | 26.4 /<br>26.9    | 4lll/<br>4lln | 18.9/16.9/<br>30.8/57.9         | 3eco/4l9n/<br>4l9t/4l9v       | 27.9 /<br>46.8                                      | 4l9j/4ld5                                               |
| AbfR           | 29.9 / 30         | 5hlh/5hlg     | 40.7                            | 5hli                          | 37                                                  | 4hbl                                                    |
| Rv2887         | 22.5              | 5hso          | 7.9 / 15.1                      | 5hsn/5hsl                     | 8.3                                                 | 5hsm                                                    |
| HcaR           | 28.6              | 5bmz          | 19.1 / 19.8<br>/ 19.5 /<br>19.2 | 4rgx /4rgu<br>/ 4rgs/<br>4rgr | 18.7                                                | 3k0l                                                    |
| ST1710         | 10.1 <sup>c</sup> | 3gji          | 23                              | 3gf2                          | 22.8                                                | 2eb7                                                    |
| TcaR           | 19.1 <sup>d</sup> | 4kdp          | 22.3/24.7                       | 4eju/3kp7                     | 26.4/22.5/<br>21.1/ 22/<br>27.6/18.3/<br>21.1/ 18.2 | 3kp2/ 3kp3/<br>3kp4/ 3kp5/<br>3kp7/ 4ejt/<br>4ejv/ 4ejw |

14 <sup>a</sup>Proposed or measured DNA binding constant below 10<sup>6</sup> M<sup>-1</sup>. <sup>b</sup> Proposed or measured DNA  
 15 binding constant above 10<sup>7</sup> M<sup>-1</sup>. <sup>c</sup> Not inserted in the major groove of the DNA. <sup>d</sup>This structure  
 16 was co-crystallized with ssDNA.  
 17

18 **Table S2.** DNA binding parameters for wild-type AdcR and substitution mutants<sup>a</sup>

| AdcR      | $K_{\text{apo,DNA}}$<br>( $\times 10^6 \text{ M}^{-1}$ ) | $\text{Zn}^{\text{II}}$                                 |                                                     | Dynamic changes ( $\text{Zn}^{\text{II}}$ ) |                        | Fractional<br>ASA <sup>b</sup> |
|-----------|----------------------------------------------------------|---------------------------------------------------------|-----------------------------------------------------|---------------------------------------------|------------------------|--------------------------------|
|           |                                                          | $K_{\text{Zn,DNA}}$<br>( $\times 10^6 \text{ M}^{-1}$ ) | $\Delta G_{\text{c}}$<br>( $\text{kcal mol}^{-1}$ ) | $\Delta S^2_{\text{axis}}$                  | $\Delta R_{\text{ex}}$ |                                |
| wild-type | $0.5 \pm 0.2$                                            | $450 \pm 220$                                           | $-4.0 \pm 0.6$                                      |                                             |                        |                                |
| I104A     | $0.20 \pm 0.01$                                          | $280 \pm 30$                                            | $-4.3 \pm 0.4$                                      | $-0.08 \pm 0.01$                            | 0.3                    | 0.04                           |
| L36A      | $0.07 \pm 0.01$                                          | $80 \pm 30$                                             | $-4.1 \pm 0.4$                                      | $0.15 \pm 0.02$                             | 3.2                    | 0.05                           |
| V34A      | $0.5^{\text{c}} \pm 0.01$                                | $13 \pm 1$                                              | $-2.2 \pm 0.3$                                      | $0.15 \pm 0.02$                             | 3.5                    | 0.46                           |
| L81V      | $0.16 \pm 0.12$                                          | $12 \pm 8$                                              | $-2.4 \pm 0.6$                                      | $0.20 \pm 0.02$                             | 0                      | 0.00                           |
| L61V      | $0.44 \pm 0.05$                                          | $21 \pm 18$                                             | $-2.3 \pm 0.1$                                      | $-0.247 \pm 0.001$                          | -0.7                   | 0.01                           |
| L57M      | $0.035 \pm 0.030$                                        | $1 \pm 0.2$                                             | $-2.0 \pm 0.7$                                      | $-0.30 \pm 0.02$                            | 0.7                    | 0.00                           |
| L57V      | $<0.05^{\text{d}}$                                       | $<0.05^{\text{d}}$                                      | N/A                                                 | $-0.30 \pm 0.02$                            | 0.7                    | 0.00                           |
| I16A      | $1.8 \pm 0.9$                                            | $17 \pm 14$                                             | $-1.8 \pm 0.4$                                      | $-0.07 \pm 0.01$                            | 3.5                    | 0.11                           |
| L4A       | $0.5 \pm 0.2$                                            | $11 \pm 8$                                              | $-1.8 \pm 0.3$                                      | $0.02 \pm 0.02$                             | 4                      | 0.01                           |
| V142A     | $0.41 \pm 0.05$                                          | $4.1 \pm 2.3$                                           | $-1.4 \pm 0.2$                                      | $-0.095 \pm 0.005$                          | 7                      | 0.31                           |
| N38A      | $0.05 \pm 0.01$                                          | $19 \pm 10$                                             | $-3.5 \pm 0.7$                                      | — <sup>e</sup>                              | —                      | —                              |
| N38A/Q40A | $0.10 \pm 0.04$                                          | $2.2 \pm 0.4$                                           | $-1.9 \pm 0.2$                                      | —                                           | —                      | —                              |
| E24D      | $0.17 \pm 0.04$                                          | $2.2 \pm 1.7$                                           | $-1.6 \pm 0.3$                                      | —                                           | —                      | —                              |

19 <sup>a</sup>Conditions: 10 mM Hepes, pH 7.0, 0.23 M NaCl, 1 mM TCEP (chelexed), 10 nM DNA, 25.0 °C  
20 with 2.0 mM EDTA (for apo-AdcR) or 20  $\mu\text{M}$   $\text{ZnCl}_2$  (for  $\text{Zn}^{\text{II}}_2$  AdcR) added to these reactions.  
21 See Fig. 6C, main text, for a graphical representation of these data. <sup>b</sup>Accessible surface area  
22 (ASA) calculated from the  $\text{Zn}^{\text{II}}_2$ -bound AdcR (Guerra *et al.*, 2011). <sup>c</sup>Upper limit on measurable  
23  $K_{\text{apo,DNA}}$  under these solution conditions. <sup>d</sup>Weaker than upper limit. <sup>e</sup>Not measurable using the  
24 NMR experiments employed here.  
25



26  
27

**Table S3.** Zinc binding affinities of wild-type AdcR and selected AdcR mutants characterized here.

| AdcR      | Zn <sup>II</sup> binding to site 2 in the homodimer |                                        |
|-----------|-----------------------------------------------------|----------------------------------------|
|           | $K_{Zn,3}$<br>( $\times 10^9 M^{-1}$ )              | $K_{Zn,4}$<br>( $\times 10^9 M^{-1}$ ) |
| wild-type | $\geq 1$                                            | $0.0205 \pm 0.0013$                    |
| V34A      | $0.0022 \pm 0.0017$                                 | $(9.4 \pm 8.2) \times 10^{-5}$         |
| L81V      | $\geq 1$                                            | $0.025 \pm 0.0027$                     |
| L61V      | $\geq 1$                                            | $0.0181 \pm 0.0022$                    |
| L57M      | $\geq 1$                                            | $0.0169 \pm 0.001$                     |
| L57V      | $\geq 1$                                            | $0.119 \pm 0.018$                      |
| I16A      | $\geq 1$                                            | $0.00479 \pm 0.0005$                   |
| V142A     | $0.00085 \pm 0.00018$                               | $< 10^{-5}$                            |

28  
29  
30  
31  
32  
33  
34  
35  
36

<sup>a</sup>Conditions: 10 mM Hepes, pH 7.2, 0.4 M NaCl, 1 mM TCEP (chelexed), 15  $\mu$ M Mf2, 25.0  $^{\circ}$ C titrated with ZnCl<sub>2</sub> solutions. Experiments were conducted 3 times for each AdcR variant. Errors of the binding constant parameters were estimated from global fits.

<sup>b</sup>  $K_{Zn,1}$  and  $K_{Zn,2}$  were fixed to a value of  $1 \times 10^{12} M^{-1}$ . <sup>c</sup>  $K_{Zn,MF2} = (4.9 \pm 0.6) \times 10^6 M^{-1}$  under these solution conditions.

37  
38

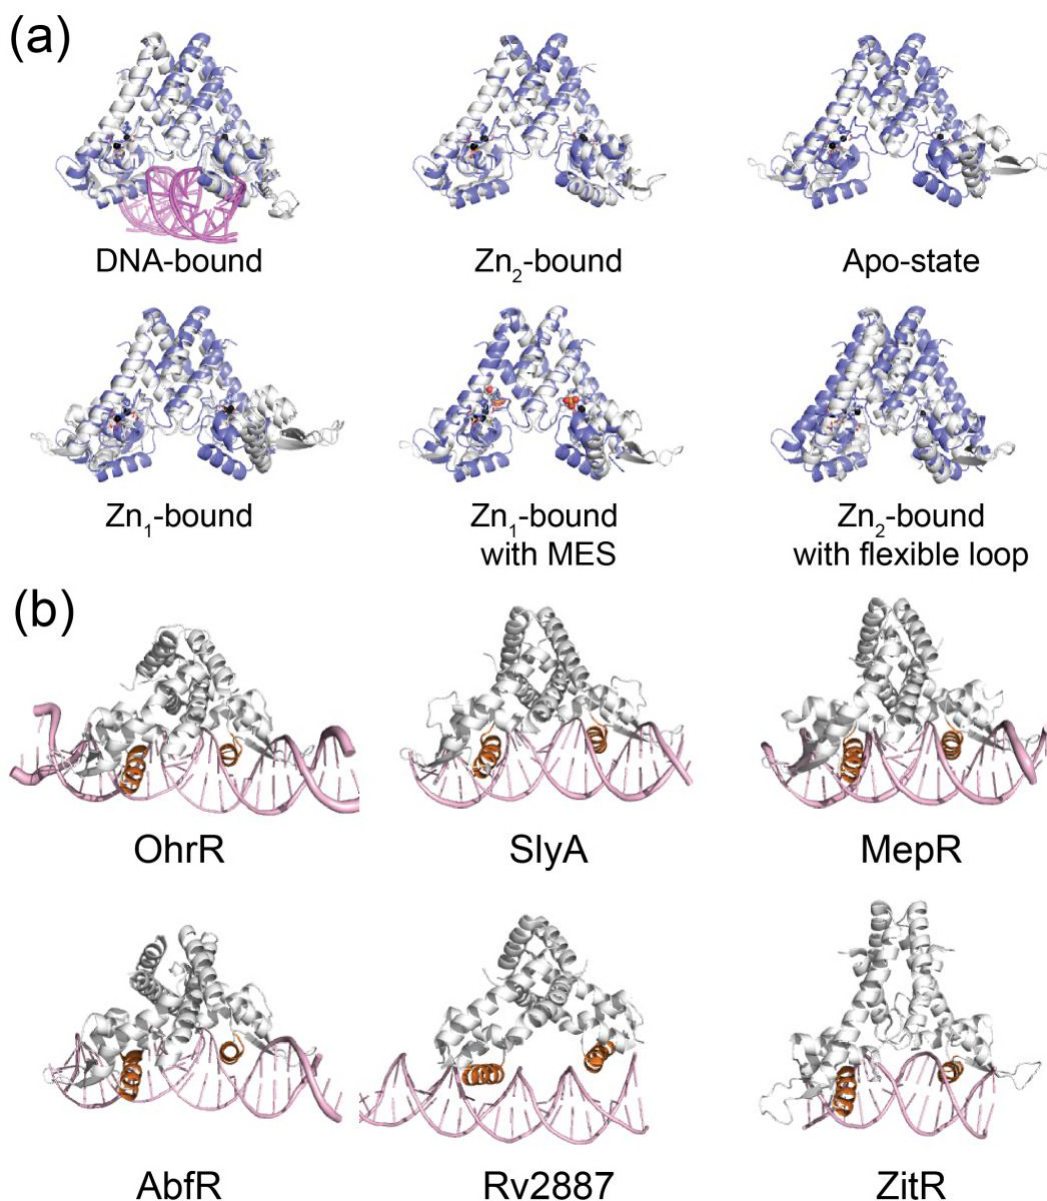

39 **Figure S1.** (a) Structural comparison (global superposition) between AdcR (3tgn, shaded *slate* in  
40 all panels, (Guerra *et al.*, 2011)) and *L. lactis* ZitR (Zhu *et al.*, 2017) in the different allosteric  
41 states (DNA-bound PDB codes, 5yi2, 5yi3; Zn<sup>II</sup><sub>2</sub>-bound, 5hyx; Apo-state, 5yi1; Zn<sub>1</sub>-bound PDB  
42 ID 5yhy, 5yl0; Zn<sup>II</sup><sub>2</sub>-bound alternative state with a MES molecule in Zn site 1, 5yhj; Zn<sub>2</sub>-bound  
43 from Group A *Streptococcus pyogenes* AdcR (Sanson *et al.*, 2015) with flexible loop, 5jls, 5lju).  
44 (b) Structural comparisons of various MarR family repressors in the DNA-bound states. (*B.*  
45 *subtilis* OhrR, PDB code, 1z9c; *S. enterica* SlyA, 3q5f; *S. aureus* MepR, 4lln; *S. epidermis*  
46 AbfR, 5hlg; *M. tuberculosis* Rv2887, 5hso; *L. Lactis* ZitR, 5yi2.

47  
48  
49

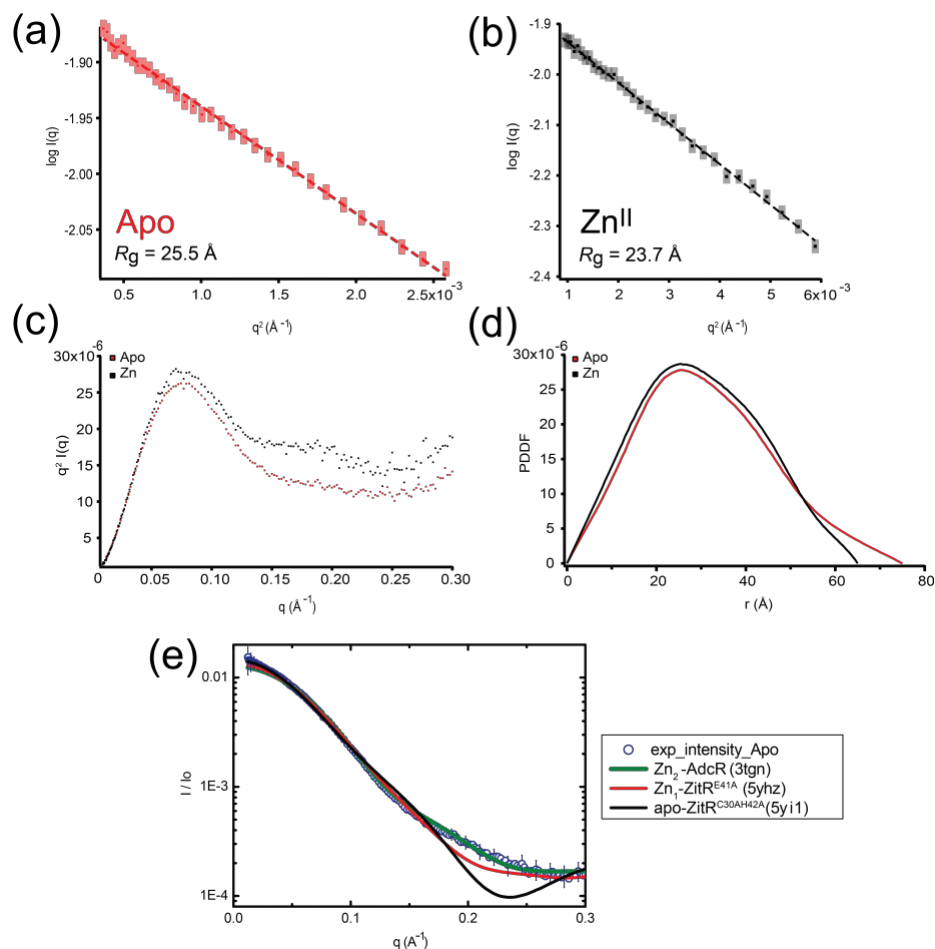

50 **Figure S2.** Small angle X-ray scattering (SAXS) analysis of AdcR in apo and Zn-binding states.  
 51 (a) The Guinier region with linear fit of the scattering curve of the AdcR apo state (red) and Zn-  
 52 binding state (black). Radius of gyration ( $R_g$ ) of each state is presented at the low left corner.  
 53 Note that scattering intensity is in arbitrary unit. (b) Dimensionless Kratky plot of the AdcR  
 54 apo (red) and Zn-binding (red) state. (c) Pair distance distribution function (PDDF) of the AdcR  
 55 apo (red) and Zn-binding (black) state. The end-to-end distance ( $D_{max}$ ) of apo state is 65 Å and  
 56  $D_{max}$  of the Zn-binding state is 75 Å. (d) Scattering profiles of AdcR apo (red) and Zn-binding  
 57 states and (e) calculated scattering profiles of crystal structures of apo ZitR<sup>C30AH42A</sup> (5yi1) and  
 58 Zn-binding ZitR<sup>E41A</sup> (5yhz) (Zhu *et al.*, 2017) compared to the experimental and fitted curves  
 59 obtained for apo-AdcR (see **Fig. 2**, main text).  
 60

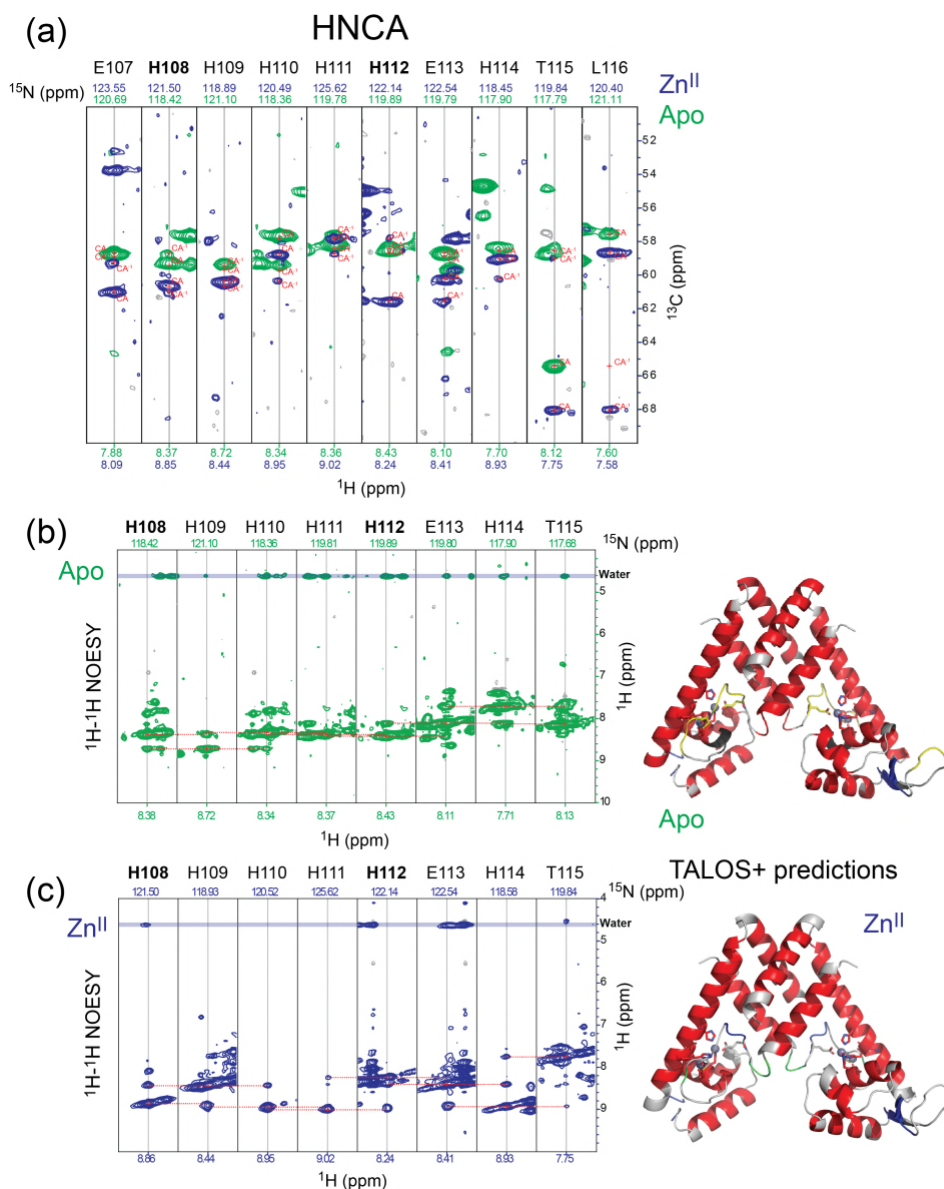

61 **Figure S3.** (a) Sequential residue-specific connectivities that link the chemical shifts of the  $^{13}\text{C}\alpha$   
 62 resonances in the  $\alpha 5$  helix (E107-L116; H108, H112  $\text{Zn}^{\text{II}}$  ligands in bold) from an HNCA  
 63 experiment. (b), (c)  $^1\text{H}$ ,  $^{15}\text{N}$  NOESY-HSQC strips obtained from the same region of the  $\alpha 5$  helix  
 64 in the apo- (b) and  $\text{Zn}^{\text{II}}_2$  (c) states. *Right*, TALOS+ predictions in the apo- (top) and  $\text{Zn}^{\text{II}}_2$   
 65 (bottom) states. Despite fully  $\alpha$ -helical predictions, the apo-state is characterized by weaker  $i$ ,  
 66  $i+2$  NH-NH correlations, and stronger NOEs (as solvent exchange crosspeaks) to water, relative  
 67 to the  $\text{Zn}^{\text{II}}$  state. This is consistent with a more highly dynamic  $\alpha 5$  helix in the apo-state.  
 68

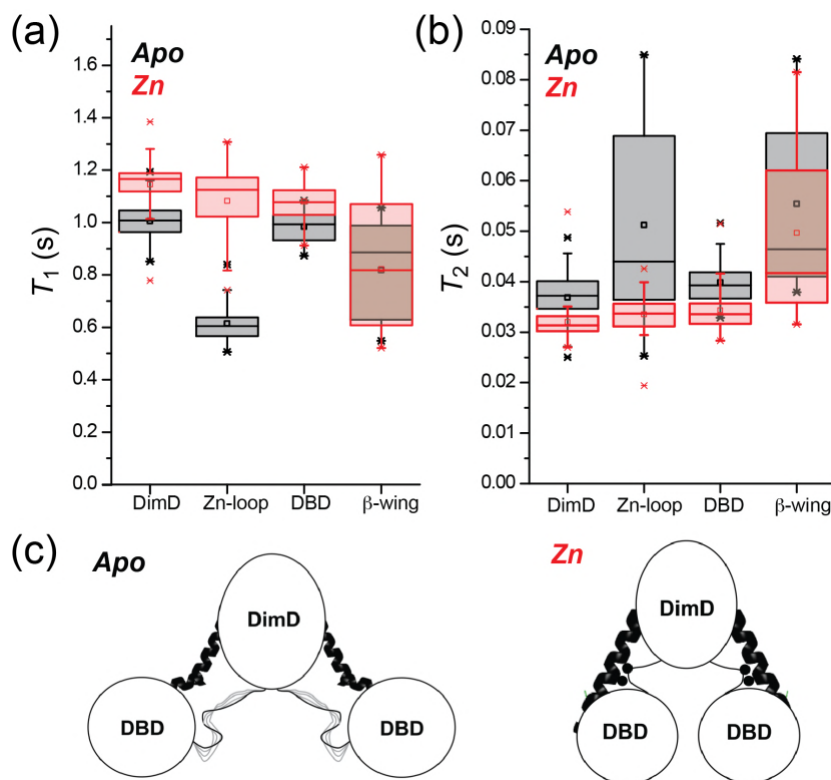

69 **Figure S4.** Average backbone amide  $^1\text{H}$ - $^{15}\text{N}$  relaxation parameters  $T_1$  ( $1/R_1$ , a) and  $T_2$  ( $1/R_2$ , b)  
 70 for the apo- (black boxes) and  $\text{Zn}^{\text{H}_2}$ - (red boxes) states of the AdcR homodimer in different  
 71 regions of the molecule: DimD, dimerization domain (residues 5-20, 101-144); Zn-loop ( $\alpha 1$ - $\alpha 2$   
 72 loop, residues 21-37); DBD, DNA binding domain (residues 38-101, excluding the  $\beta$ -wing;  $\beta$ -  
 73 wing (residues 81-101). (c) Cartoon representations of the data shown in panels (a) and (b) in  
 74 which the two linkers that connect the two domains (middle of the  $\alpha 5$ -helix, *dark coil*;  $\alpha 1$ - $\alpha 2$   
 75 loop, *light pencil*) are more dynamic in the apo-state. Note that residues analogous to the  $\alpha 1$ - $\alpha 2$   
 76 loop in AdcR are not observed in the crystal structure of the apo-state of *L. lactis* ZitR (Zhu *et*  
 77 *al.*, 2017) (see Fig. S1A), consistent with these findings in solution in apo-AdcR.  
 78

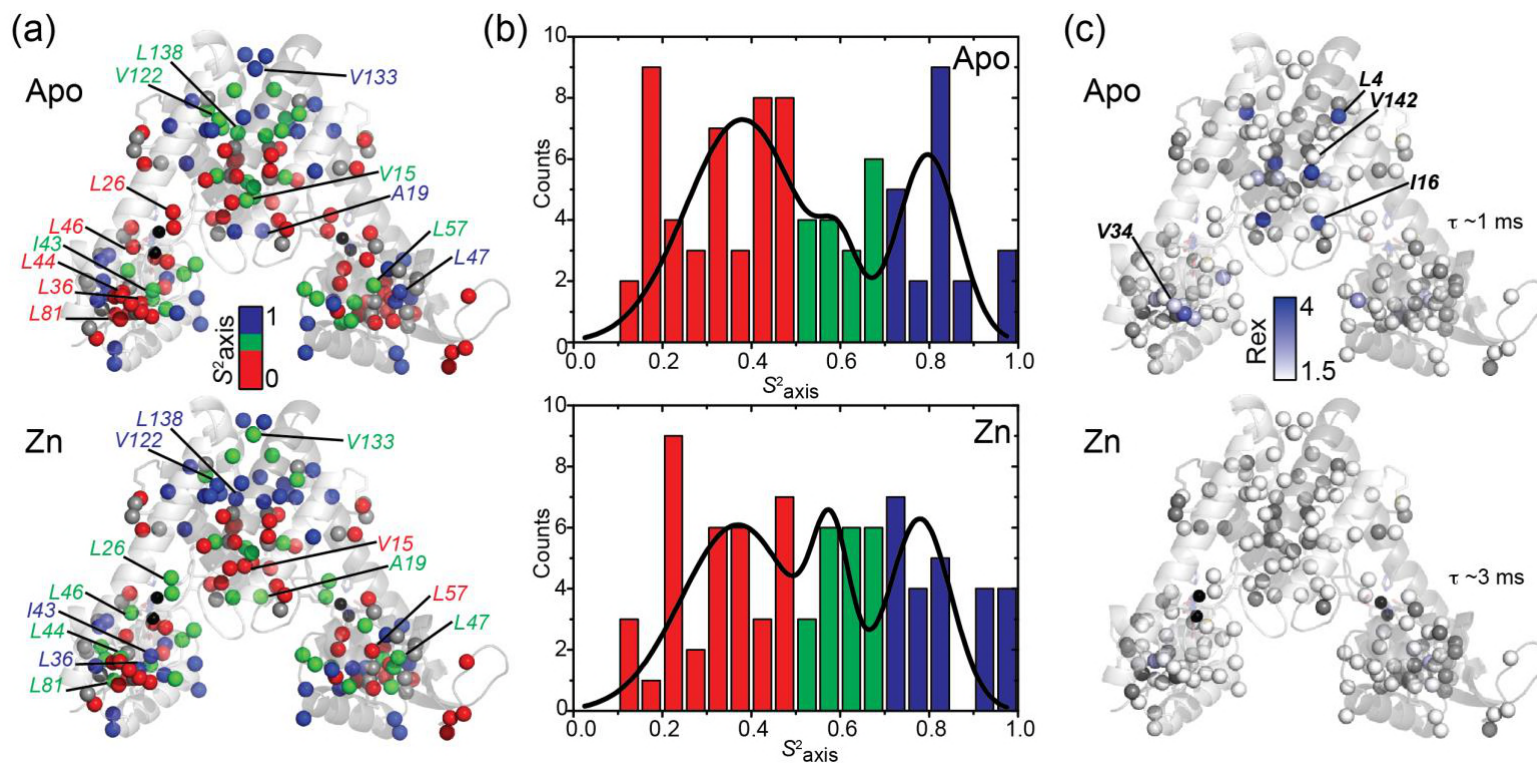

79 **Figure S5.** Absolute values of methyl group order parameters,  $S^2_{axis}$  (a) and  $R_{ex}$  (c) on the methyl-bearing residues. (b) Histogram plot  
 80 of  $S^2_{axis}$  from fitting the apo (*top*) and  $Zn^{II}_2$  (*bottom*) states in panel (a) calculated according to (Marlow *et al.*, 2010).

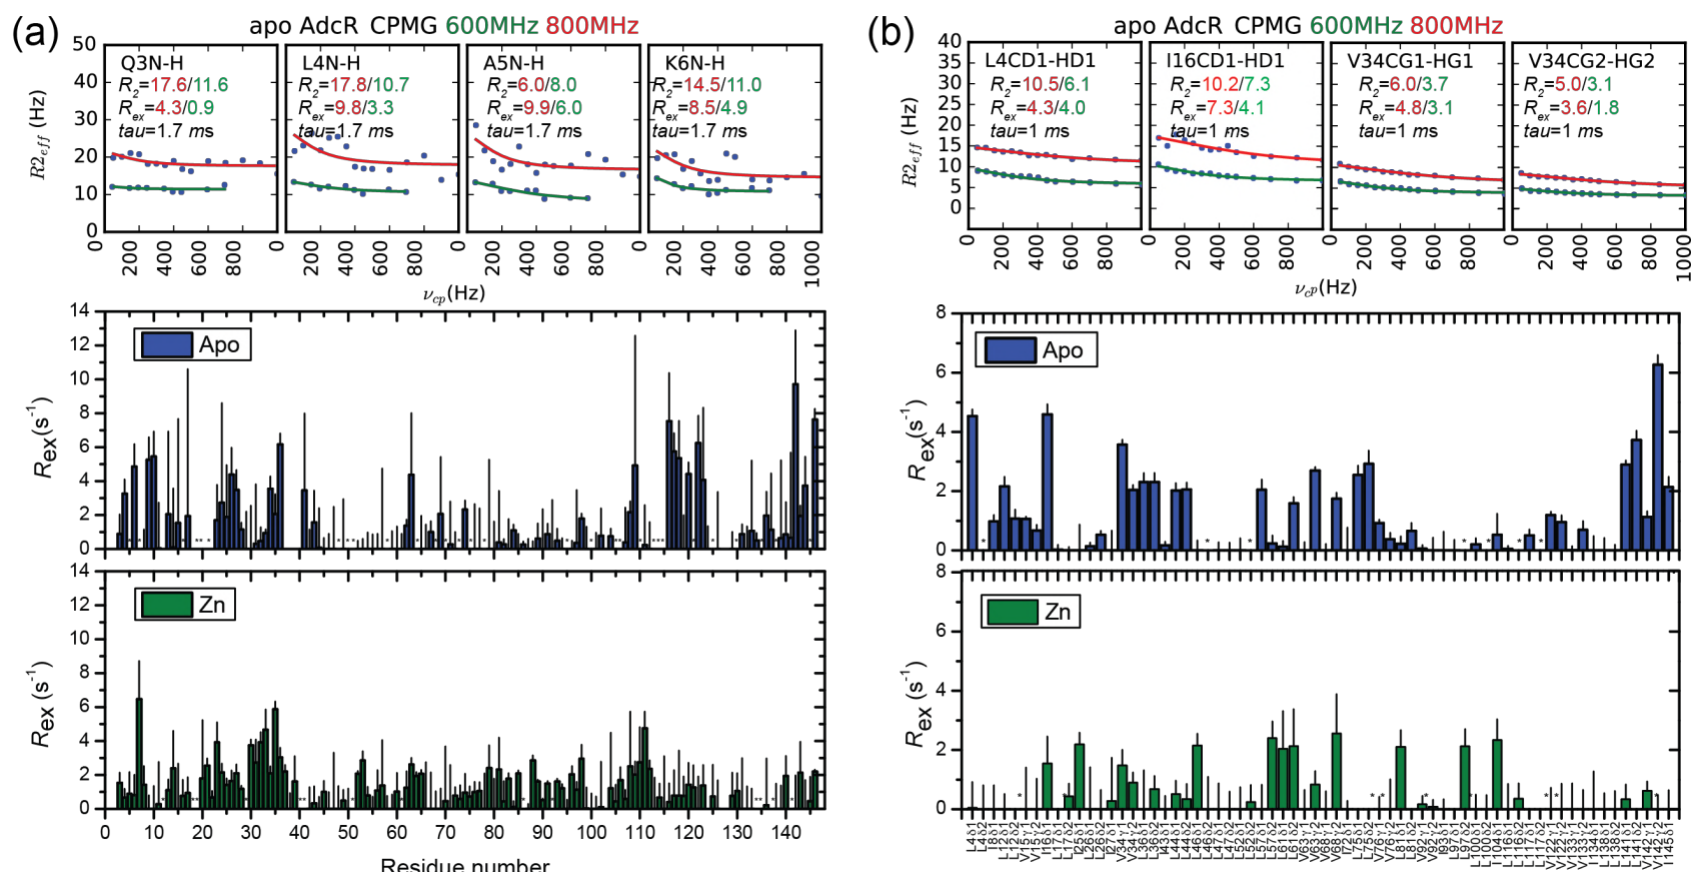

81  
 82 **Figure S6.** Representative raw relaxation dispersion curves obtained for the indicated backbone (NH) (a) or methyl group (b) used to  
 83 obtain  $R_{ex}$  at 600 MHz and 800 MHz.  $R_{ex}$  for both allosteric states at 600 MHz are shown in each panel. All the residues excluded due  
 84 to overlap are shown with an asterisk (Backbone Apo: 5, 7, 16, 18, 19, 22, 48, 50, 51, 58, 64, 68, 70, 73, 75, 78, 95, 100, 105, 106,  
 85 110, 113, 114, 115, 121, 125, 130, 135, 138, 145; Backbone Zn-bound: 12, 18, 19, 29, 40, 41, 51, 61, 86, 92, 134, 135, 137, 141;  
 86 Sidechain Apo: L4- $\delta$ 2, L46- $\delta$ 2, L52- $\delta$ 2, L97- $\delta$ 2, L100- $\delta$ 2, L116- $\delta$ 2, L117- $\delta$ 2; Sidechain Zn-bound: L12- $\delta$ 2, L17- $\delta$ 1, L57- $\delta$ 1, L75- $\delta$ 1,  
 87 L75- $\delta$ 2, L81- $\delta$ 2, L97- $\delta$ 1, L117- $\delta$ 1, L117- $\delta$ 2, L141- $\delta$ 2).  
 88

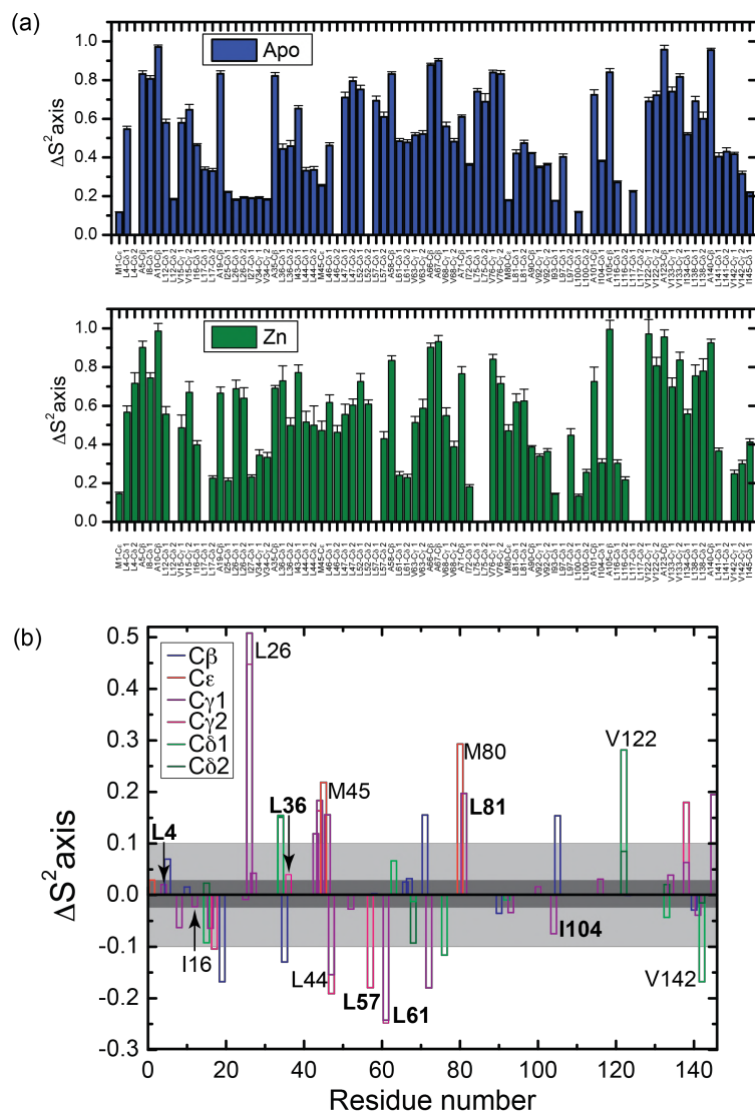

89  
 90 **Figure S7.** (a) Stereospecific methyl group axial order parameters,  $S^2_{axis}$ , for apo- and  $Zn^{II}_2$ -  
 91 AdcR as measured at 600 MHz (similar results were obtained at 800 MHz; data not shown). (b)  
 92 Difference in axial order parameter ( $\Delta S^2_{axis} = S^2_{axis}^{Zn} - S^2_{axis}^{apo}$ ) between apo- and  $Zn^{II}_2$ -states, with  
 93 the specific type of methyl group color-coded as indicated: C $\beta$ , Ala; C $\epsilon$ , Met; C $\gamma$ 1, C $\gamma$ 2, Val;  
 94 C $\delta$ 1, C $\delta$ 2, Leu.



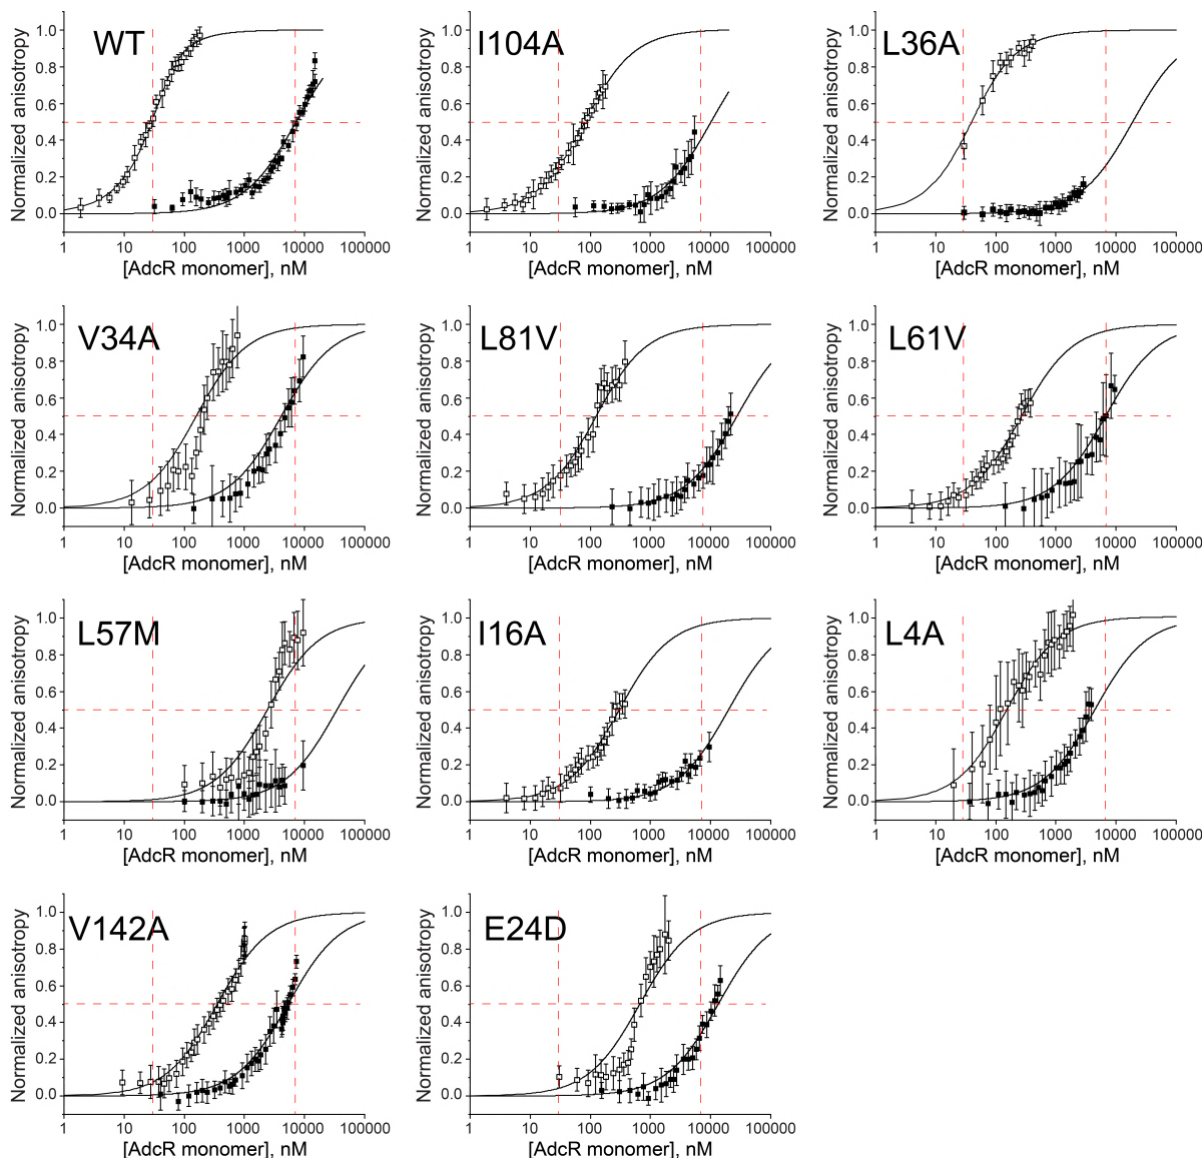

95 **Figure S8.** Representative DNA operator binding isotherms obtained for selected for wild-type  
96 (WT) AdcR and selected AdcR mutants in the apo- and  $\text{Zn}^{\text{II}}_2$ -states. The *continuous* lines  
97 through each set of data correspond to nonlinear least squares fit to a 1:1 non-dissociable AdcR  
98 dimer binding model, with parameters compiled in Table S2, and  $\Delta G_c$  shown graphically in Fig.  
99 6c (**main text**). The *red vertical and horizontal lines* represent the AdcR monomer  
100 concentrations that correspond to 50% DNA-saturation points for the wild-type AdcR under the  
101 same solution conditions, presented as a guide only. Conditions: 10 mM Hepes, pH 7.0, 0.23 M  
102 NaCl, 1 mM TCEP (chelexed), 10 or 20 nM nM DNA, 25.0 °C with 1.0 mM EDTA (for apo-  
103 AdcR) or 20  $\mu\text{M}$   $\text{ZnCl}_2$  (for  $\text{Zn}^{\text{II}}_2$  AdcR) added to these reactions. Experiments were conducted 3  
104 times for each AdcR variant.  
105

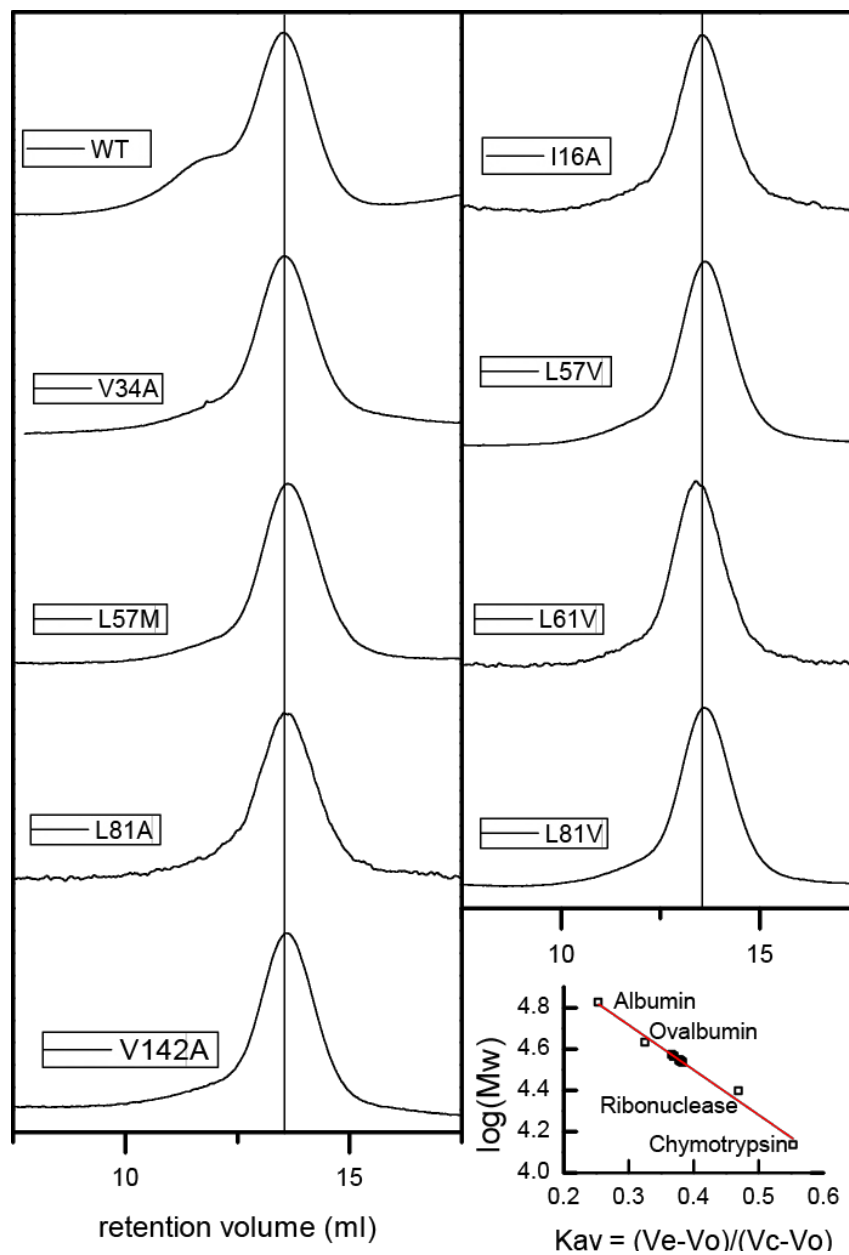

106 **Figure S9.** Gel filtration chromatograms for AdcR variants in the apo-state. *Lower right,*  
107 *calibration curve with standards (empty squares) and AdcR variants (filled squares).*  
108  
109

110

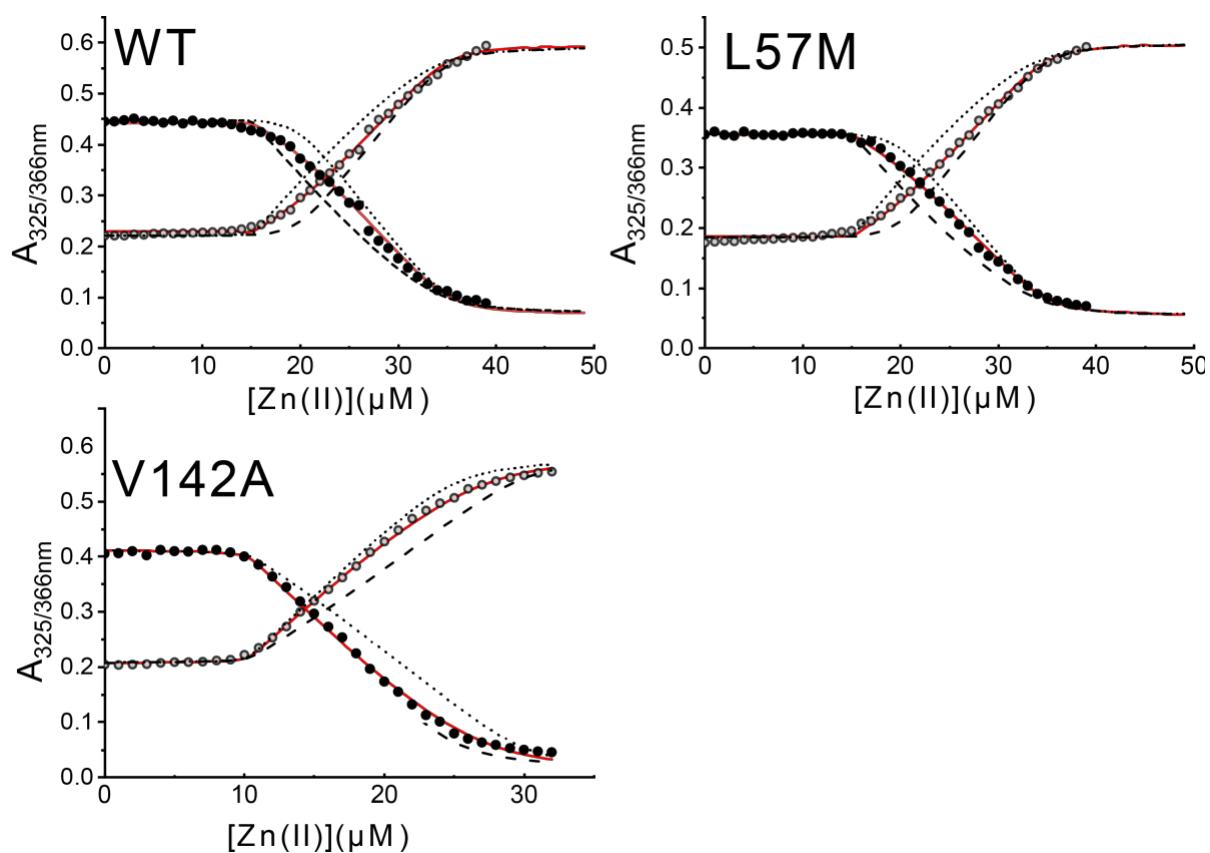

111 **Figure S10.** Representative Zn<sup>II</sup>-binding isotherms obtained from a titration of apo (metal-free)  
112 wild-type AdcR or a mutant AdcR and mag-fura-2 (mf2) with ZnSO<sub>4</sub>. Zn<sup>II</sup> binding parameters  
113 for these and other AdcRs are compiled in Table S3. Experiments were conducted 3 times for  
114 each AdcR variant.  
115

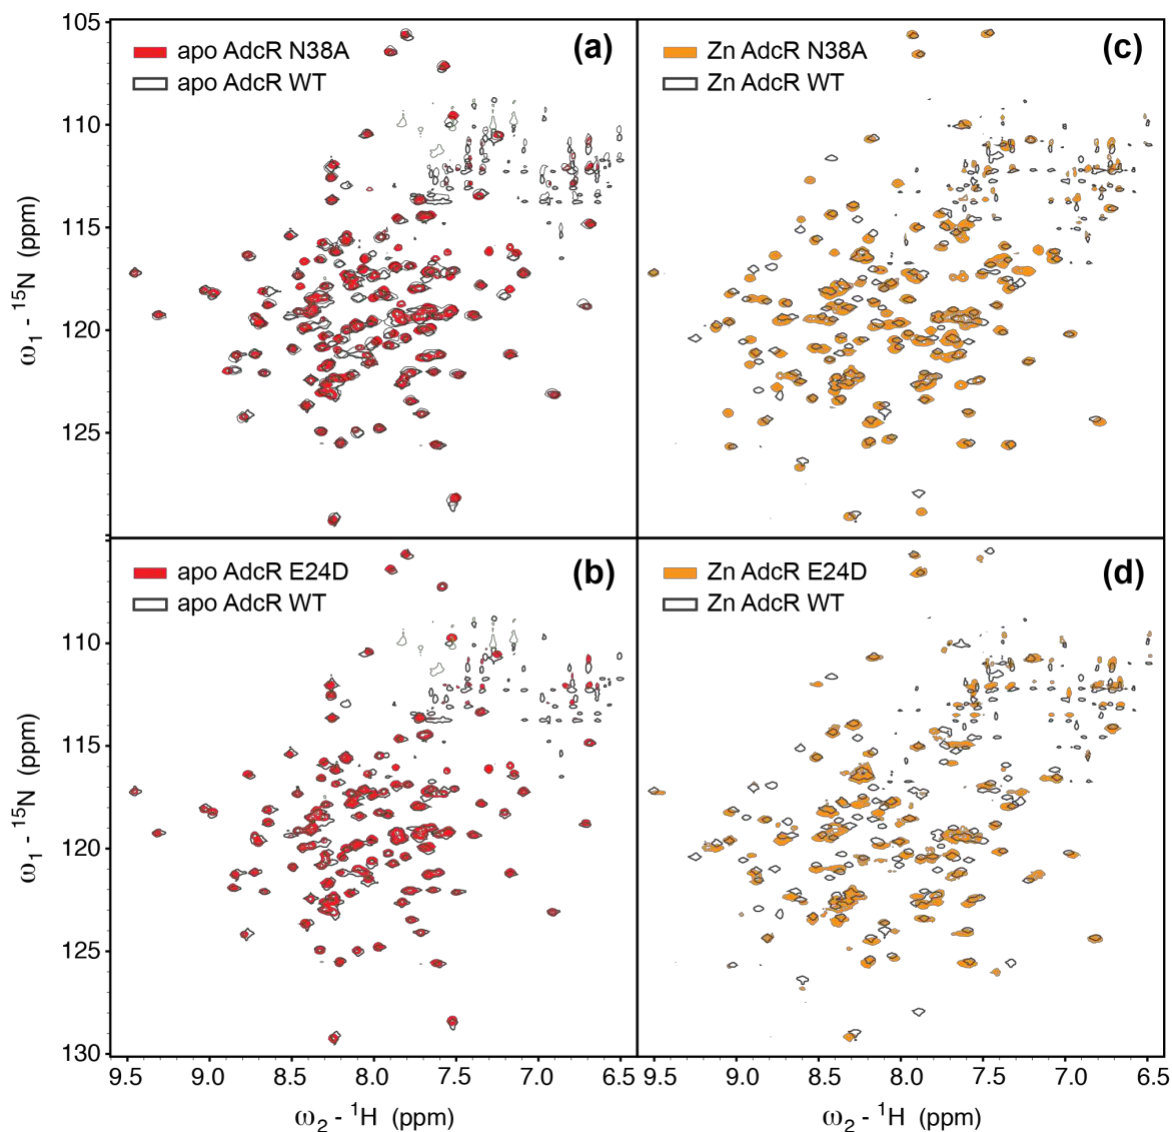

116 **Figure S11.** 2D  $^1\text{H}$ ,  $^{15}\text{N}$  TROSY spectra of apo- (*left*) and  $\text{Zn}^{\text{II}}$  (*right*) states of N38A and E24D  
117 AdcRs, compared to the wild-type AdcR (*black* contour; since contour line shown) acquired  
118 under the same solution conditions (50 mM NaCl, pH 6.0, 35 °C).  
119  
120

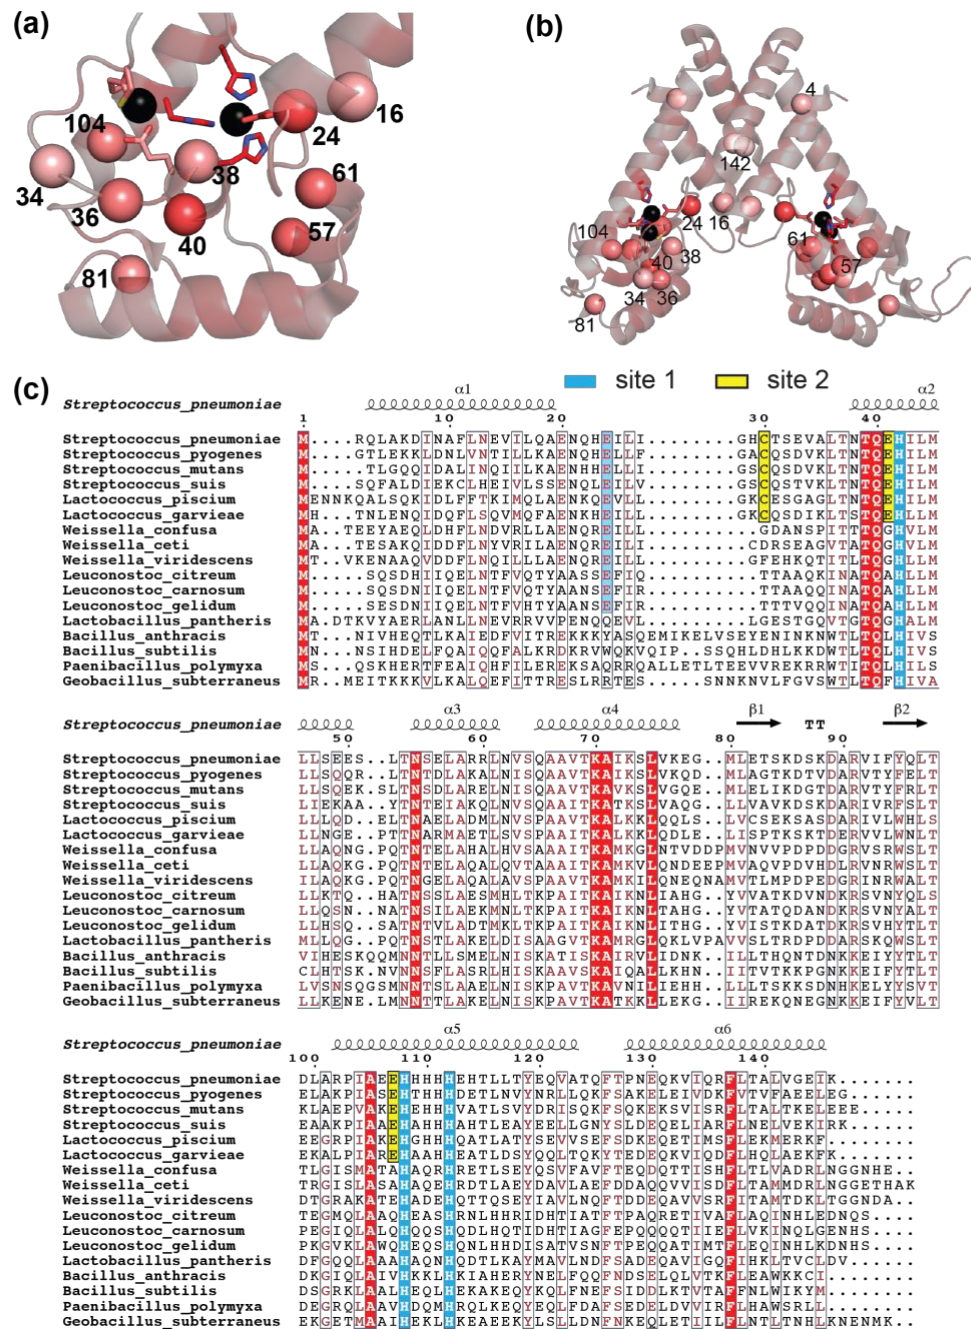

121 **Figure S12.** Amino acid sequence conservation of *S. pneumoniae* AdcR and candidate closely  
 122 related MarR family repressors. Sequence conservation highlighting those residues targeted for  
 123 mutagenesis in this work with a C $\alpha$  sphere on the Zn<sup>II</sup><sub>2</sub> AdcR structure (Guerra *et al.*, 2011) in  
 124 the DNA binding domain (a) and the entire molecule (b). The ribbon structure shows the degree  
 125 of conservation by ramping the color from *white* to *bright red*, with those residues of high  
 126 conservation shaded *bright red*, using Protskin (Ritter *et al.*, 2004). For reference, Zn<sup>II</sup> ligands  
 127 are invariant (100% conserved). (b) Multiple sequence analysis of the 17 AdcR-like repressors  
 128 used to create the sequence conservation map.

129

130 **References**

- 131
- 132 Guerra AJ, Dann CE, Giedroc DP. 2011. Crystal structure of the zinc-dependent MarR family  
133 transcriptional regulator AdcR in the Zn(II)-bound state. *J Am Chem Soc.* 133:19614-  
134 19617.
- 135 Marlow MS, Dogan J, Frederick KK, Valentine KG, Wand AJ. 2010. The role of conformational  
136 entropy in molecular recognition by calmodulin. *Nat Chem Biol.* 6:352-358.
- 137 Ritter B, Denisov AY, Philie J, Deprez C, Tung EC, Gehring K, McPherson PS. 2004. Two  
138 WXXF-based motifs in NECAPs define the specificity of accessory protein binding to  
139 AP-1 and AP-2. *EMBO J.* 23:3701-3710.
- 140 Sanson M, Makthal N, Flores AR, Olsen RJ, Musser JM, Kumaraswami M. 2015. Adhesin  
141 competence repressor (AdcR) from *Streptococcus pyogenes* controls adaptive responses  
142 to zinc limitation and contributes to virulence. *Nucleic Acids Res.* 43:418-432.
- 143 Zhu R, Song Y, Liu H, Yang Y, Wang S, Yi C, Chen PR. 2017. Allosteric histidine switch for  
144 regulation of intracellular zinc(II) fluctuation. *Proc Natl Acad Sci U S A.* 114:13661-  
145 13666.
- 146
